# Supplementary material for: Migration status and prevalence of diabetes and hypertension in Gauteng province, South Africa: effect modification by demographic and socioeconomic characteristics—a cross-sectional population-based study
Source: PubMed Central journal article supplement — BMJ Open. 2019 Sep 27;9(9):e027427. doi: 10.1136/bmjopen-2018-027427 (PMC6773310; doi:10.1136/bmjopen-2018-027427), 2019-09-27
Supplement: bmjopen-2018-027427.draft_revisions.pdf [file bmjopen-2018-027427.draft_revisions.pdf]

# BMJ Open

BMJ Open is committed to open peer review. As part of this commitment we make the peer review history of every article we publish publicly available.

When an article is published we post the peer reviewers' comments and the authors' responses online. We also post the versions of the paper that were used during peer review. These are the versions that the peer review comments apply to.

The versions of the paper that follow are the versions that were submitted during the peer review process. They are not the versions of record or the final published versions. They should not be cited or distributed as the published version of this manuscript.

BMJ Open is an open access journal and the full, final, typeset and author-corrected version of record of the manuscript is available on our site with no access controls, subscription charges or pay-per-view fees (<http://bmjopen.bmj.com>).

If you have any questions on BMJ Open's open peer review process please email [info.bmjopen@bmj.com](mailto:info.bmjopen@bmj.com)

# BMJ Open

## Migration status and prevalence of diabetes and hypertension in Gauteng province, South Africa: effect modification by demographic and socio-economic characteristics

|                               |                                                                                                                                                                                     |
|-------------------------------|-------------------------------------------------------------------------------------------------------------------------------------------------------------------------------------|
| Journal:                      | <i>BMJ Open</i>                                                                                                                                                                     |
| Manuscript ID                 | bmjopen-2018-027427                                                                                                                                                                 |
| Article Type:                 | Research                                                                                                                                                                            |
| Date Submitted by the Author: | 23-Oct-2018                                                                                                                                                                         |
| Complete List of Authors:     | Motlhale, Melitah; University of the Witwatersrand School of Public Health, School of Public Health<br>Ncayiyana, Jabulani; University of Cape Town, Epidemiology and Biostatistics |
| Keywords:                     | migration status, prevalence, diabetes, Hypertension < CARDIOLOGY, Gauteng province                                                                                                 |
|                               |                                                                                                                                                                                     |

SCHOLARONE™  
Manuscripts

# Migration status and prevalence of diabetes and hypertension in Gauteng province, South Africa: effect modification by demographic and socio-economic characteristics

Melitah Motlhale<sup>1</sup>, Jabulani R. Ncayiyana<sup>1,2</sup>

\* Correspondence: motlhalemelitah@gmail.com

<sup>1</sup>Division of Epidemiology and Biostatistics, School of Public Health, Faculty of Health Sciences, University of the Witwatersrand, Johannesburg, South Africa.

<sup>2</sup>Division of Epidemiology and Biostatistics, School of Public Health and Family Medicine, Faculty of Health Sciences, University of Cape Town, Cape Town, South Africa.

## Abstract

**Introduction:** Evidence from developing countries suggests that migration status has an impact on health. However, little is known about the effect that migration status has on morbidity in sub-Saharan Africa. The aim of this study is to investigate the association between migration status and hypertension and diabetes and to assess whether the association was modified by demographic and socio-economic characteristics.

**Methods:** A Quality of Life survey conducted in 2015 collected data on migration status and morbidity from a sample of 28,007 adults in 508 administrative wards in Gauteng province. Migration status was divided into three groups: non-migrant if born in Gauteng province, internal migrant if born in other South African provinces, and external migrant if born outside of South Africa. Diabetes and hypertension were defined based on self-reported clinical diagnosis. We applied a recently developed original, stepwise-multilevel logistic regression of discriminatory accuracy to investigate the association between migration status and hypertension and diabetes. Potential effect modification by age, sex, race, SES and ward-level deprivation on the association between migration status and morbidities was tested.

**Results:** Migrants have lower prevalence of diabetes and hypertension. In multilevel models, migrants had lower odds of reporting hypertension than internal migrants (OR = 0.86 95%CI: 0.78-0.95) and external migrant (OR = 0.60; 95%CI: 0.49-0.75). Being a migrant was also associated with lower diabetes prevalence than being an internal migrant (OR = 0.84; 95%CI: 0.75-0.94) and external migrant (OR = 0.53; 95%CI: 0.41-0.68). Age, race and SES were significant effect modifiers of the association between migration status and morbidities. There was also substantial residual between-ward variance in hypertension and diabetes with median odds ratio of 1.61 and 1.24, respectively.

**Conclusions:** Migration status is associated with prevalence of two non-communicable conditions. The association was modified by age, race and SES. Ward-level effects also explain differences in association.

**Keywords:** migration status, prevalence, diabetes, hypertension and Gauteng province.

## Strengths and limitations of this study

- The study population is part of a provincial representative sample on quality of life of adult residents in Gauteng province.
- The association between migration and health was analysed by applying, stepwise-multilevel logistic regression of discriminatory accuracy.
- Migrants (both internal and external) had lower odds of both hypertension and diabetes than people born in Gauteng province.
- Effect of migration status on health differed by age, race and SES.
- However, residual confounding is possible due to data availability.

## Introduction

Migration status is one of the important socioeconomic determinants of health [1]. Migration is also associated with profound social, economic and cultural changes, which may affect the migrant's health [2]. Post the year 2005, more than 62% of the South African population were living in urban areas, with the rapid urbanization being attributed to migration [3, 4]. The rapid urbanization and increase in the urban poor in metropolitan areas of Gauteng province, South Africa has become a major public health concern due to its linkage with increased disease burden [5, 6].

Migrants are heterogeneous both in their origin status and migration histories. Gauteng province attracts both internal and external migrants [3, 4]. Several studies on migration and morbidities have been done worldwide [1, 2, 7]. Morbidities often present with low functioning level, poorer quality of life, increased health care utilization and mortality rates [7]. The first South African National Health and Nutrition Examination Survey (SANHANES) reported the prevalence of 19.4% and 25.7% for diabetes and hypertension respectively in Gauteng province [8]. However, little is known about the prevalence of these morbidities among different migrant status. A better understanding of the differences in morbidities according to different migration status is needed to target high risk groups in provision of services and to arrest the growing burden of certain diseases.

## Study objectives

The study aims to:

- Investigate the association between morbidities and migration status in Gauteng province, South Africa.
- To assess whether the association was modified by demographic and socio-economic characteristics.

## Methods

### Study setting

Gauteng is the province with the largest population, estimated to be 12,272263, despite having the smallest area; thus, it has the highest population density in South Africa of 675 people per km<sup>2</sup> [9]. According to data from Census 2011 Gauteng province accounted for the highest concentration of international and internal migrants in South Africa, approximately 7.4% and 44% respectively [10]. The study population consists of all people residing permanently in Gauteng province who were aged 18 or older in 2015.

### Data sources

We used data from the fourth Quality of Life (QoL) Survey conducted by Gauteng City Region Observatory (GCRO) in Gauteng province in 2015. The QoL survey has been conducted every 2 years since 2009 with the intention of providing up-to-date information on 'a fast growing and dynamic urban region' to support 'better planning and management, and improved co-operative government relations' [11]. QoL survey measured a wide range of variables including socio-

1  
2  
3 demographic variables, migration status and self-reported health status from a sample of 28,007  
4 adults in 508 administrative wards in Gauteng province. The data on ward-level migrant African  
5 population, African population, migrant SADC population, employed population, no income  
6 population, deprivation index (sampi) and average household size was obtained from Statistics  
7 South Africa (StatsSA).  
8

### 9 **Survey design**

10 Simple random sampling was employed to select the respondents. Gauteng province consists  
11 of 10 municipalities and it is subdivided into 508 wards. Within these wards there are Small Area  
12 Levels (SALs) which were derived from the Population Census Enumerator Area (EA) polygons.  
13 SAL codes and geography were derived from the Statistics South Africa Census 2011 report.  
14 The simple random sampling method was used to select the SALs from each ward, and then  
15 the minimum numbers of interviews for each ward were 30 and 60 interviews for those falling in  
16 district municipalities and metropolitan municipalities, respectively. The end result was that  
17 across the 508 wards, 28,456 successful interviews were completed, and these interviews were  
18 distributed across 16,400 SALs out of a total of 17,840 SALs. The 'NEXT' birthday method was  
19 used to select the respondents from the selected households. Data were collected via a digital  
20 data collection instrument using an open source system called Formhub and administered on a  
21 tablet device. Questionnaires were administered in the field and uploaded using Internet  
22 connectivity to a cloud server from where they could be accessed and downloaded online.  
23  
24

### 25 **Patient and Public Involvement**

26 The development of the research questions and outcome measures were not informed by  
27 patients' priority experiences and preferences. Patients were not involved in the design of this  
28 study. Patients were not involved in the recruitment and conduct of the study. This study used  
29 data from 2015 QoL survey which measured a wide range of variables including socio-  
30 demographic variables, migration status and self-reported health status.  
31  
32

### 33 **Outcome and independent variables**

34 The main outcomes were hypertension and diabetes. The information on disease status, such  
35 as diabetes, hypertension, HIV, TB, Influenza, and others, was collected in the QoL survey by  
36 asking question: "In the past 12 months, have you been told by health provider that you have  
37 one or more of the following conditions. The morbidities were binary variables measuring the  
38 presence of the different morbidities, coded as 1 (or 'yes') if the respondents self-reported the  
39 morbidity and as 0 (or 'no') if the respondent did not report the presence of a given morbidity.  
40

41 Migration status was derived from the following QoL survey questions: (i) "*Were you born in*  
42 *Gauteng province or did you move into Gauteng province from another province or country?*";  
43 (ii) *When (year) did you move into Gauteng province?*; (iii) *Did you move to Gauteng province*  
44 *from a province in South Africa or from another country?*; (iv) *From which province did you*  
45 *move from into Gauteng province?*; and (v) *Which country did you move into Gauteng province*  
46 *from?* Migration status then was divided into three groups: non-migrant, internal migrant, and  
47 external migrant. The explanatory variables included sex, age, race, education, employment  
48 status, dwelling, total household income, grow own vegetables, medical aid, physical activity,  
49 household size, household food security and socioeconomic status quintile. Information  
50 collected included demographic and socio-economic variables: sex (female, male); age (18  
51 years and above); race (African, Coloured, Indian/Asian, White and Other); Education was  
52 categorized into 'No formal education', grades R-7 'Primary only', grades 8-11 'Secondary  
53 incomplete', 'Matric' grade 12 'More' Tertiary and above and 'Unspecified' for those who didn't  
54 specify; employment status ('employed', 'unemployed and other').  
55  
56  
57  
58  
59  
60

1  
2  
3 Dwelling (formal, informal and other); Total household income was categorized into 'Lower class  
4 income' (< 6400 Rand [ZAR] per month), 'Middle class income' (R6400 - R51, 200 per month)  
5 and 'Upper class income' (> R51, 200 per month); grow own vegetables (do not grow own  
6 vegetables and grow their own vegetables); Medical insurance was categorized into 'medically  
7 insured' for respondents with either medical aid or a hospital plan and 'medically not insured' for  
8 respondents without any of these; physical activity (never, hardly ever, few times a month, few  
9 times a week and everyday); household size (1-3, 4-6 and 7+); household food security (never,  
10 seldom, sometimes, often and always) and socioeconomic status quintile (richest, 2<sup>nd</sup>, 3<sup>rd</sup>, 4<sup>th</sup>  
11 and poorest). The ward level variables included migrant African population, African population,  
12 migrant SADC population, employed population, no income population, sampi and household of  
13 less than three.  
14

## 15 Analysis

16 Descriptive analysis was performed to describe the migration status of the community by socio  
17 demographic characteristics of study respondents using proportions. The prevalence of  
18 morbidities in Gauteng province, South Africa was estimated using proportions and presented  
19 as percentages with 95% confidence intervals. Prevalence of morbidities was stratified by age,  
20 gender and migration status.  
21  
22

23 In the present analysis the data used was in multilevel structure as the respondents were within  
24 administrative wards [12]. We applied a recently developed original, stepwise-multilevel logistic  
25 regression of discriminatory accuracy to investigate the effect of migration status. We fitted  
26 separate models for effect of migration status and diabetes and hypertension, respectively. Four  
27 progressively adjusted multilevel models were carried out: model 0 with no covariates; model 1  
28 including only sociodemographic characteristics at the individual level; model 2 additionally  
29 analysing municipal deprivation as contextual variable and model 3 is the full adjusted model.  
30 The models were adjusted for years in GP, age, sex, race, dwelling, education level, household  
31 size, household head, physical activity, medical aid, grow own vegetables, household food  
32 security, sampi, year moved to GP and socioeconomic status quintile. Potential effect  
33 modification by age, sex, race, SES and sampi was tested.  
34  
35

36 To take account of the hierarchical data structure (level 1: individuals; level 2: administrative  
37 wards), an Intraclass Correlation Coefficient (ICC) and ward-level variances were reported for  
38 every model and for reasons of better interpretability, ward-level variances were converted into  
39 median ORs (MORs) by applying the formula of Merlo *et al*, [12, 13]. Multilevel logistic  
40 regression analyses with administrative wards as random intercepts were performed calculating  
41 ORs with their 95% CIs. ORs were plotted using the user-written *coefplot* Stata command [14].  
42 All analysis was performed using Stata version 13 (Stata Corporation, College Station, Texas,  
43 USA).  
44

## 45 Results

46 Most respondents were non-migrants 18,027 (64%) and the external migrants constituted only  
47 8% of the total respondents. Of the total study population of 28,007 respondents 14,966 (53%)  
48 were female (**Table 1**). The majority of the respondents were aged between 18 to 27 years and  
49 were African 22,560 (79%). Most respondents 9,152 (33%) had matric level of education and  
50 only 443 (1.6%) had no formal education. Close to half of the respondents were employed  
51 13,582 (49%). The majority of the respondents stayed in formal dwellings 24,043 (86%). A large  
52 proportion of the respondents fall under the lower income bracket based on their total house  
53 hold income 13,015 (71%) lower class was defined in this study as families with a total  
54 household income of less than R6,400 per month while 2.3% fall under the upper class (Upper  
55  
56  
57  
58  
59  
60

class is a family with an income more than R51,200). Few respondents reported growing their own vegetables 3,480 (12%).

Table 1: Demographic characteristics across migration status

| Variable            | Level                  | Non- migrants  | Internal migrants | External migrants | Total  |
|---------------------|------------------------|----------------|-------------------|-------------------|--------|
| Sex                 | Female                 | 9,746 (65.12)  | 4,226 (28.24)     | 994 (6.64)        | 14,966 |
|                     | Male                   | 8,281 (63.50)  | 3,593 (27.55)     | 1,167 (8.95)      | 13,041 |
| Age group           | 18-27                  | 5,288 (64.54)  | 2,205 (26.91)     | 701 (8.56)        | 8,194  |
|                     | 28-37                  | 4,400 (59.64)  | 2,197 (29.78)     | 781 (10.59)       | 7,378  |
|                     | 38-47                  | 3,362 (64.46)  | 1,507 (28.89)     | 347 (6.65)        | 5,216  |
|                     | 48-57                  | 2,456 (69.12)  | 938 (26.40)       | 159 (4.48)        | 3,553  |
|                     | 58-67                  | 1,493 (71.78)  | 503 (24.18)       | 84 (4.04)         | 2,080  |
|                     | 68+                    | 1,028 (64.82)  | 469 (29.57)       | 89 (5.61)         | 1,586  |
| Race                | African                | 13,819 (61.25) | 6,901 (30.59)     | 1 840 (8.16)      | 22,560 |
|                     | Coloured               | 940 (83.26)    | 180 (15.94)       | 9 (0.80)          | 1,129  |
|                     | Indian/Asian           | 389 (62.94)    | 154 (24.92)       | 75 (12.14)        | 618    |
|                     | White                  | 2,848 (79.55)  | 575 (16.06)       | 157 (4.39)        | 3,580  |
|                     | Other                  | 31 (25.83)     | 9 (7.50)          | 80 (66.67)        | 120    |
| Education           | No education           | 223 (50.34)    | 162 (36.57)       | 58 (13.09)        | 443    |
|                     | Primary only           | 1,621 (53.71)  | 1,029 (34.10)     | 368 (12.19)       | 3,018  |
|                     | Secondary incomplete   | 5,007 (61.29)  | 2,451 (30.00)     | 712 (8.71)        | 8,170  |
|                     | Matric                 | 6,210 (67.85)  | 2,468 (26.97)     | 474 (5.18)        | 9,152  |
|                     | More                   | 4,399 (69.34)  | 1,526 (24.05)     | 419 (6.60)        | 6,344  |
|                     | Unspecified            | 371 (65.78)    | 88 (15.60)        | 105 (18.62)       | 564    |
| Employment status   | Employed               | 8,426 (62.04)  | 3,838 (28.26)     | 1,318 (9.70)      | 13,582 |
|                     | Unemployed             | 4,808 (63.82)  | 2,282 (30.29)     | 444 (5.89)        | 7,534  |
|                     | Other                  | 4,664 (69.80)  | 1,636 (24.48)     | 382 (5.72)        | 6,682  |
| Dwelling            | Formal                 | 16,478 (68.54) | 5,954 (24.76)     | 1,611 (6.70)      | 24,043 |
|                     | Informal               | 1,442 (40.25)  | 1,659 (46.30)     | 482 (13.45)       | 3,583  |
|                     | Other                  | 107 (28.08)    | 206 (54.07)       | 68 (17.85)        | 381    |
| Total HH Income     | Lower Class            | 7,991 (61.40)  | 4,000 (30.73)     | 1,024 (7.87)      | 13,015 |
|                     | Middle Class           | 3,325 (67.49)  | 1,246 (25.29)     | 356 (7.23)        | 4,927  |
|                     | Upper class            | 291 (70.29)    | 85 (20.53)        | 38 (9.18)         | 414    |
| Grow own vegetables | Do not grow vegetables | 15,850 (64.62) | 6,772 (27.61)     | 1,905 (7.77)      | 24,527 |
|                     | Grow vegetables        | 2,177 (62.56)  | 1,047 (30.09)     | 256 (7.36)        | 3,480  |
| Medical Aid         | No medical insurance   | 12,219 (61.68) | 5,883 (29.70)     | 1,707 (8.62)      | 19,809 |
|                     | Medical insurance      | 4,927 (71.39)  | 1,617 (23.43)     | 358 (5.19)        | 6,902  |
| Physical activity   | Never                  | 4,478 (58.59)  | 2,481 (32.46)     | 684 (8.95)        | 7,643  |
|                     | Hardly ever            | 2,357 (66.17)  | 934 (26.22)       | 271 (7.61)        | 3,562  |
|                     | Few times a month      | 2,447 (69.91)  | 851 (24.31)       | 202 (5.77)        | 3,500  |
|                     | Few times a week       | 4,356 (67.14)  | 1,687 (26.00)     | 445 (6.86)        | 6,488  |



|                       |                          |                |               |              |        |
|-----------------------|--------------------------|----------------|---------------|--------------|--------|
|                       | Everyday                 | 4,193 (64.53)  | 1,771 (27.25) | 534 (8.22)   | 6,498  |
| HH size               | 1-3                      | 9,167 (60.67)  | 4,451 (29.46) | 1,491 (9.87) | 15,109 |
|                       | 4-6                      | 6,736 (67.84)  | 2,631 (26.50) | 562 (5.66)   | 9,929  |
|                       | 7+                       | 1,928 (72.67)  | 642 (24.20)   | 83 (3.13)    | 2,653  |
| HH Food security      | Never                    | 14,372 (64.51) | 6,095 (27.36) | 1,813 (8.14) | 22,280 |
|                       | Seldom                   | 1,138 (65.25)  | 496 (28.44)   | 110 (6.31)   | 1,744  |
|                       | Sometimes                | 2,008 (62.75)  | 993 (31.03)   | 199 (6.22)   | 3,200  |
|                       | Often                    | 345 (66.99)    | 147 (28.54)   | 23 (4.47)    | 515    |
| SES quintiles         | Always                   | 164 (61.19)    | 88 (32.84)    | 16 (5.97)    | 268    |
|                       | Richest                  | 2,716 (49.27)  | 2,136 (38.74) | 661 (11.99)  | 5,513  |
|                       | 2 <sup>nd</sup> quintile | 3,549 (63.89)  | 1,608 (28.95) | 398 (7.16)   | 5,555  |
|                       | 3 <sup>rd</sup> quintile | 3,627 (66.03)  | 1,498 (27.27) | 368 (6.70)   | 5,493  |
|                       | 4 <sup>th</sup> quintile | 3,972 (70.79)  | 1,293 (23.04) | 346 (6.17)   | 5,611  |
| Year moved to Gauteng | Poorest                  | 4,066 (73.09)  | 1,146 (20.60) | 351 (6.31)   | 5,563  |
|                       | After 2009               |                | 1,543 (69.63) | 673 (30.37)  | 2,216  |
|                       | 2005-2009                |                | 1,242 (67.83) | 589 (32.17)  | 1,831  |
|                       | 1995-2004                |                | 2,524 (82.94) | 519 (17.06)  | 3,043  |
|                       | 1985-1994                |                | 1,290 (85.60) | 217 (14.40)  | 1,507  |
|                       | Before 1985              |                | 1,219 (88.21) | 163 (11.79)  | 1,382  |

### The prevalent morbidities in Gauteng province

The overall prevalence of hypertension and diabetes was 15.5% (95% CI: 15.1-15.9), 11.2% (95% CI: 10.8-11.6), respectively (**Table 2**). The prevalence of hypertension and diabetes was higher among non-migrants.

Table 2: Prevalence of hypertension and diabetes

| Characteristics         | Hypertension % (95% CI) | Diabetes % (95% CI) |
|-------------------------|-------------------------|---------------------|
| <b>Overall</b>          | 15.5 (15.1 - 15.9)      | 11.2 (10.8 - 11.6)  |
| <b>Age group years</b>  |                         |                     |
| 18-27                   | 11.3 (10.5 - 12.1)      | 8.4 (7.7 - 9.1)     |
| 28-37                   | 8.7 (8.1 - 9.4)         | 6.3 (5.7 - 6.8)     |
| 38-47                   | 11.8 (11.0 - 12.6)      | 9.0 (8.3 - 9.7)     |
| 48-57                   | 21.1 (19.9 - 22.5)      | 14.6 (13.5 - 15.8)  |
| 58-67                   | 32.2 (30.3 - 34.1)      | 21.4 (19.7 - 23.1)  |
| 68+                     | 39.8 (37.5 - 42.2)      | 30.5 (28.3 - 32.7)  |
| <b>Sex</b>              |                         |                     |
| Male                    | 12.1 (11.5 - 12.7)      | 10.1 (9.6 - 10.6)   |
| Female                  | 18.5 (17.9 - 19.1)      | 12.1 (11.7 - 12.7)  |
| <b>Migration status</b> |                         |                     |
| Non-migrant             | 16.8 (16.3 - 17.4)      | 12.6 (12.1 - 13.1)  |
| Internal migrant        | 14.4 (13.7 - 15.2)      | 9.7 (9.1 - 10.4)    |
| External migrant        | 8.1 (7.1 - 9.4)         | 5.1 (4.3 - 6.2)     |

Note: % = percentage, 95%CI = 95% Confidence Interval

### The effect of migration status on hypertension and diabetes



The effect of migration status on hypertension and diabetes based on analysis of multilevel logistic regression models is presented on **Table 3**. Three models were fitted, the first model only included the individual or household factors, the second model included ward factors and the final model included all factors. Compared to non-migrants, internal migrants and external migrants in the final model had reduced odds of self-reporting hypertension with the OR of 0.86 (95% CI: 0.78-0.95) and 0.60 (95% CI: 0.49-0.75) respectively. Being a migrant was also associated with lower risk of diabetes with OR of 0.84 (95% CI: 0.75-0.94) and 0.53 (95% CI: 0.41-0.68). While there was a reduction in the variance between the null and full models and ICC vary for both outcomes. There was substantial residual between-ward variance in hypertension and diabetes with median odds ratio of 1.31 and 1.14 respectively as presented in the final model.

Table 3: The effect of migration status on the most prevalent morbidities

| Characteristics            | Null Model       | Model 1 <sup>a</sup><br>OR (95% CI) | Model 2 <sup>b</sup><br>OR (95% CI) | Model 3 <sup>c</sup><br>OR (95% CI) |
|----------------------------|------------------|-------------------------------------|-------------------------------------|-------------------------------------|
| <b>Hypertension</b>        |                  |                                     |                                     |                                     |
| <b>Migration status</b>    |                  |                                     |                                     |                                     |
| Non-migrant                |                  | 1.00                                | 1.00                                | 1.00                                |
| Internal migrant           |                  | 0.85 (0.77-0.95)                    | 0.90 (0.83-0.97)                    | 0.86 (0.78-0.95)                    |
| External migrant           |                  | 0.59 (0.48-0.74)                    | 0.52 (0.44-0.61)                    | 0.60 (0.49-0.75)                    |
| <b>Random Effects</b>      |                  |                                     |                                     |                                     |
| Between-ward variance (SE) | 0.25 (0.050)     | 0.15 (0.035)                        | 0.10 (0.023)                        | 0.08 (0.021)                        |
| ICC                        | 0.07             | 0.04                                | 0.03                                | 0.02                                |
| MOR                        | 1.61 (1.46-1.76) | 1.45 (1.33-1.57)                    | 1.35(1.26-1.44)                     | 1.31 (1.22-1.40)                    |
| <b>Diabetes</b>            |                  |                                     |                                     |                                     |
| <b>Migration status</b>    |                  |                                     |                                     |                                     |
| Non-migrant                |                  | 1.00                                | 1.00                                | 1.00                                |
| Internal migrant           |                  | 0.84 (0.75-0.94)                    | 0.77 (0.70-0.84)                    | 0.84 (0.75-0.94)                    |
| External migrant           |                  | 0.51 (0.40-0.66)                    | 0.41 (0.37-0.50)                    | 0.53 (0.41-0.68)                    |
| <b>Random Effects</b>      |                  |                                     |                                     |                                     |
| Between-ward variance (SE) | 0.05 (0.014)     | 0.04 (0.015)                        | 0.02 (0.007)                        | 0.02 (0.011)                        |
| ICC                        | 0.02             | 0.01                                | 0.01                                | 0.00                                |
| MOR                        | 1.24 (1.17-1.31) | 1.22 (1.13-1.30)                    | 1.13 (1.07-1.19)                    | 1.14 (1.06-1.22)                    |

**Note:** OR = Odds ratio, 95%CI = 95% Confidence Interval, ICC = intraclass correlation coefficient, MOR = median odds ratio, <sup>a</sup> = the individual/HH level factors, <sup>b</sup> = the Ward level factors and <sup>c</sup> = all factors.

To further assess effect modification of age, race and SES, we ran grade-stratified analysis. The association between migration status and hypertension is significantly modified by race. For Africans, migration status (both internal and external) was associated with lower odds of hypertension, while internal and external Asian migrants have higher odds of hypertension. From the interaction assessment between migration status and race, age group and socioeconomic status, respectively were found to be effect modifiers for hypertension (**Figure 1**) and diabetes (**Figure 2**).

**Figure 1: Association between migration status and hypertension, by race, age group and SES**

Figure shows race-, age group- and SES-stratified, fully adjusted ORs in hypertension and associated 95% CIs.

**Figure 2: Association between migration status and diabetes, by race, age group and SES**

Figure shows race-, age group- and SES-stratified, fully adjusted ORs in diabetes and associated 95% CIs.

## Discussion

The findings from this study provide important information on migration status and the prevalence of morbidities among residents of 508 administrative wards in Gauteng province from a population-based survey. The study also adds to a pool of knowledge on prevalent morbidities and migration status in Gauteng province South Africa. The major strength of this study is that it tries to assess prevalence of morbidities and predictors of the most prevalent morbidities from a large population-based survey. The potential of the study was maximized and included the vulnerable population like migrants. The migrants made up 36% of the total respondents.

The most prevalent morbidities in Gauteng province were hypertension and diabetes at 15.5% and 11.2% respectively. The prevalence of diabetes in South Africa is increasing rapidly [15]. In 2009 it was approximately 9% among those aged 30 years and older [16]. Based on the population census the prevalence of diabetes was around 7% according to the International Diabetes Federation (IDF) [17, 18]. Hypertension was found to be around 14.0% for those aged 25 and older [19]. South African National Health and Nutrition Examination Survey (SANHANES) reported slightly higher prevalence of diabetes (19.4%) and hypertension (25.7%) [8]. Hypertension and diabetes were higher among non-migrants. The migrant population is believed to keep increasing in different countries; their heterogeneity becomes apparent with respect to the differences in the prevalence of diseases [7]. Prevalence is likely to increase therefore, these findings can be used to inform future policy, planning and funding allocation to assist in controlling as well as managing different conditions [20].

Migration status was associated with prevalence of two non-communicable conditions. Non-communicable diseases are the most common health problem and are the primary cause of death in many countries [21]. Research revealed that compared to native-born respondents, migrants reported better health [22]. This is consistent with our findings, migrants reported lower prevalence of diabetes and hypertension. Effect of migration status on health differed by age group, race and socio-economic status. Migrants might find themselves in a worse socioeconomic status, with less access to health care services, and experiencing greater linguistic and cultural barriers related to accessing health information, despite the conditions they tend to have better health profiles compared to the natives [23]. A number of studies have shown that this health advantage deteriorates over time and with successive generations [22, 24, 25]. There is a lack of studies on morbidity among migrants compared to natives [7]. This study clearly demonstrates a need for more research on migration and different morbidities.

## Strengths and limitations

This study contributes to the pool of knowledge as little research has been done on migration status and morbidities in Gauteng province, South Africa. Assessment of predicts for the most prevalent morbidities was done from a very large population based representative sample survey. Therefore, the power of the study to detect significant associations was maximized. The respondents were selected by random sampling thus both internal and external validity of the study were improved. The study included the migrant population and little research has been done on the morbidities affecting this sub-population. A wide variety of socio-demographic factors were employed to assess their association with the two most prevalent morbidities.

The morbidities were self-reported thus prevalence might be underestimated. Self-reported data can be biased by differential access to healthcare services between groups of different

1  
2  
3 socioeconomic status [26]. When self-reported information was compared with medical records  
4 or clinical measurements from health examination surveys in Colorado, Netherlands and 12  
5 countries in Europe, self-reported information underestimated the prevalence of hypertension  
6 [27, 28].  
7

8 Missing data of some important health-related information, might have resulted in residual  
9 confounding because of unmeasured potential confounders.  
10

## 11 12 **Conclusion**

13 Migration status is associated with two non-communicable conditions prevalent in Gauteng  
14 province. From the public health perspective, it is important to evaluate the prevalence of  
15 morbidities because the information can inform the development of prevention programme on a  
16 community level.  
17

## 18 19 **Acknowledgements**

20 The authors would like to thank Gauteng City-Region Observatory (GCRO) for providing us with the data  
21 to conduct the research.  
22

## 23 24 **Author contributions**

25 Concept and design of the study: JN, Acquisition of data: JN, Analysis and interpretation of data: JN, MM,  
26 Drafting the manuscript: JN, MM, Revising the manuscript critically for important intellectual content: JN,  
27 MM and approval of the manuscript to be published: JN and MM  
28

## 29 30 **Disclosure statement**

31 No potential conflict of interest was reported by the authors.  
32

## 33 34 **Ethics and Consent**

35 For the primary study ethics approval was obtained from the local ethics committee and the Human  
36 Research Ethics Committee of University of the Witwatersrand. All respondents provided informed  
37 consent before data collection. The study was granted ethics clearance by the Human Research Ethics  
38 Committee of University of the Witwatersrand.  
39

## 40 41 **Funding Information**

42 None.  
43

44 **Word count:** 2495 (excluding title, abstract, reference, figures and tables, acknowledgements,  
45 author contribution, disclosure statement, ethics and consent and funding information).  
46  
47  
48  
49  
50  
51  
52  
53  
54  
55  
56  
57  
58  
59  
60

## References

1. Patra S, Bhise MD. Gender differentials in prevalence of self-reported non-communicable diseases (NCDs) in India: evidence from recent NSSO survey. *Journal of Public Health*. 2016;24:375-85.
2. Westman E, Martelin T, Härkänen T, Koskinen S, Sundquist K. Migration and self-rated health: a comparison between Finns living in Sweden and Finns living in Finland. *Scandinavian Journal of Public Health*. 2008;36:698-705.
3. Kok P, Collinson M. Migration and Urbanization in South Africa. Pretoria, South Africa: Statistics South Africa, 2006.
4. Turok I. Urbanisation and Development in South Africa: Economic Imperatives Spatial Distortions and Strategic Responses. Pretoria, South Africa Environment Development United Nations Population Fund, 2012.
5. Grief MJ, Dodoo FN, Jayaraman A. Urbanisation, Poverty and Sexual behaviour: The tale of Five African cities. *Urban Studies*. 2011;48:947-57.
6. Thomas F, Haour M, Aggleton P. Mobility, sexuality and AIDS. New York, USA: Routledge; 2010.
7. Diaz E, Poblador-Pou B, Gimeno-Feliu L-A, Calderón-Larrañaga A, Kumar BN, Prados-Torres A. Multimorbidity and Its Patterns according to Immigrant Origin. A Nationwide Register-Based Study in Norway. *PLoS ONE* 2015;10(12):e0145233.
8. Shisana O, Labadarios D, Rehle T, Simbayi L, Zuma K, Dhansay A, Reddy P, Parker W, Hoosain E, Naidoo P, Hongoro C, Mchiza Z, Steyn NP, Dwane N, Makoae M, Maluleke T, Ramlagan S, Zungu N, Evans MG, Jacobs L, Faber M, & SANHANES-1 Team (2013) South African National Health and Nutrition Examination Survey (SANHANES-1). Cape Town: HSRC Press.

9. Gauteng City Region Observatory. GCRO Data Brief Key: Findings from Statistics South Africa's 2011 National Census for Gauteng. South Africa. Gauteng City Region Observatory, 2012.
10. Statistics South Africa. Statistical Release: Census 2011 South Africa. Pretoria, South Africa: Statistics South Africa 2012.
11. Gauteng City Region Observatory. Quality of life Survey Technical Report. Johannesburg, South Africa: Gauteng City Regional Observatory 2015.
12. Merlo J, Wagner P, Ghith N, Leckie G. An Original Stepwise Multilevel Logistic Regression Analysis of Discriminatory Accuracy: The Case of Neighbourhoods and Health. *PLoS ONE*. 2016;11(4):e0153778.
13. Adjaye-Gbewonyo K, Kawachi I, Subramanian SV, Avendano M. Income inequality and cardiovascular disease risk factors in a highly unequal country: a fixed-effects analysis from South Africa *International Journal for Equity in Health*. 2018;17 (31):1-13.
14. Jann B. Plotting regression coefficients and other estimates. *The Stata Journal*. 2014; 14(4):708-37.
15. Pheiffer C, Pillay-van Wyk V, Joubert JD, Levitt, N, Nglazi M. D, Bradshaw D. The prevalence of type 2 diabetes in South Africa: a systematic review protocol. *BMJ Open* 2018;8:e021029. doi:10.1136/bmjopen-2017-021029.
16. Bertram MY, Jaswal AV, Van Wyk VP, Levitt NS, Hofman KJ. The non-fatal disease burden caused by type 2 diabetes in South Africa, 2009. *Global Health Action*. 2013;6:19244.
17. IDF. International Diabetes Federation, Diabetes Atlas. Seventh Edition. Brussels, IDF. 2015.
18. StatsSA. Mid-year population estimates 2015. 2015 (July). Available from: <http://www.statssa.gov.za/publications/P0302/P03022015.pdf>.
19. Statistics South Africa. Use of health facilities and levels of selected health conditions in South Africa: Findings from the General Household Survey, Pretoria, South Africa: Statistics South Africa 2013.
20. Keel S, Foreman J, Xie J, Van Wijngaarden P, Taylor HR, Dirani M. The Prevalence of Self-Reported Diabetes in the Australian National Eye Health Survey. *PLoS ONE*. 2017;12(1):e0169211.
21. Teh JKL, Tey NP, Ng ST. Ethnic and gender differentials in non-communicable diseases and self-rated health in Malaysia. *PLoS ONE*. 2014;9:e91328.
22. Lee S, O'Neill AH, Ihara ES, Chae DH. Change in Self-Reported Health Status among Immigrants in the United States: Associations with Measures of Acculturation. *PLoS ONE*. 2013;8(10):e76494.
23. Frisbie WP, Cho Y, Hummer RA. Immigration and the health of Asian and Pacific Islander adults in the United States. *American Journal of Epidemiology*. 2001;153:372-380. doi:10.1093/aje/153.4.372. PubMed: 11207155.
24. Antecol H, Bedard K. Unhealthy assimilation: Why do immigrants converge to American health status levels? *Demography*. 2006;43: 337-360. doi:10.1353/dem.2006.0011. PubMed: 16889132.
25. Singh GK, Miller BA. Health, life expectancy, and mortality patterns among immigrant populations in the United States. *Canadian Journal of Public Health*. 2004; 95: 114-121. PubMed: 15191127.
26. Vellakkal S, Subramanian SV, Millett C, Basu S, Stuckler D, Ebrahim S. Socioeconomic Inequalities in on-Communicable Diseases Prevalence in India: Disparities between Self-Reported Diagnoses and Standardized Measures. *PLoS ONE* 2013;8(7):e68219.
27. Tolonen H, Koponen P, Mindell JS, Männistö S, Giampaoli S, Dias CM, et al. Under-estimation of obesity, hypertension and high cholesterol by self-reported data:

1  
2  
3 comparison of self-reported information and objective measures from health examination  
4 surveys. *European Journal of Public Health*. 2014;24(6):941-8.

5 28 Molenaar EA, Van Ameijden EJ, Grobbee DE, Numans ME. Comparison of routine care  
6 self-reported and biometrical data on hypertension and diabetes: results of the Utrecht  
7 Health Project. *European Journal of Public Health*. 2007;17(2):199-205.  
8  
9  
10  
11  
12  
13  
14  
15  
16  
17  
18  
19  
20  
21  
22  
23  
24  
25  
26  
27  
28  
29  
30  
31  
32  
33  
34  
35  
36  
37  
38  
39  
40  
41  
42  
43  
44  
45  
46  
47  
48  
49  
50  
51  
52  
53  
54  
55  
56  
57  
58  
59  
60

For peer review only

1  
2  
3  
4  
5  
6  
7  
8  
9  
10  
11  
12  
13  
14  
15  
16  
17  
18  
19  
20  
21  
22  
23  
24  
25  
26  
27  
28  
29  
30  
31  
32  
33  
34  
35  
36  
37  
38  
39  
40  
41  
42  
43  
44  
45  
46  
47  
48  
49  
50  
51  
52  
53  
54  
55  
56  
57  
58  
59  
60

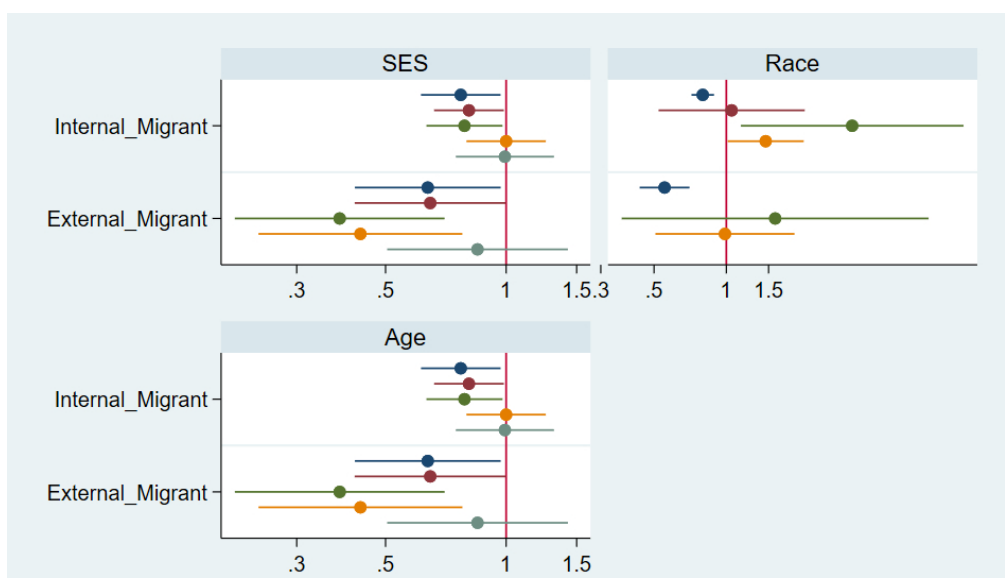

Association between migration status and hypertension, by race, age group and SES



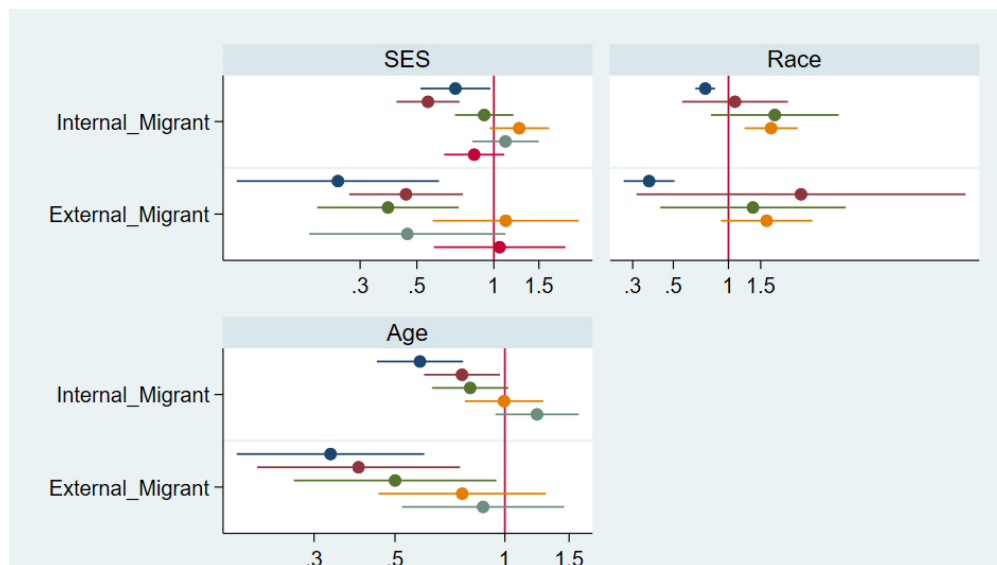

Association between migration status and diabetes, by race, age group and SES

**STROBE 2007 (v4) checklist of items to be included in reports of observational studies in epidemiology\***  
**Checklist for cohort, case-control, and cross-sectional studies (combined)**

| Section/Topic             | Item # | Recommendation                                                                                                                                                                                                                                                                                                                                                                                                                                                         | Reported on page # |
|---------------------------|--------|------------------------------------------------------------------------------------------------------------------------------------------------------------------------------------------------------------------------------------------------------------------------------------------------------------------------------------------------------------------------------------------------------------------------------------------------------------------------|--------------------|
| Title and abstract        | 1      | (a) Indicate the study's design with a commonly used term in the title or the abstract                                                                                                                                                                                                                                                                                                                                                                                 | 1                  |
|                           |        | (b) Provide in the abstract an informative and balanced summary of what was done and what was found                                                                                                                                                                                                                                                                                                                                                                    | 1                  |
| <b>Introduction</b>       |        |                                                                                                                                                                                                                                                                                                                                                                                                                                                                        |                    |
| Background/rationale      | 2      | Explain the scientific background and rationale for the investigation being reported                                                                                                                                                                                                                                                                                                                                                                                   | 2                  |
| Objectives                | 3      | State specific objectives, including any pre-specified hypotheses                                                                                                                                                                                                                                                                                                                                                                                                      | 2                  |
| <b>Methods</b>            |        |                                                                                                                                                                                                                                                                                                                                                                                                                                                                        |                    |
| Study design              | 4      | Present key elements of study design early in the paper                                                                                                                                                                                                                                                                                                                                                                                                                | 2                  |
| Setting                   | 5      | Describe the setting, locations, and relevant dates, including periods of recruitment, exposure, follow-up, and data collection                                                                                                                                                                                                                                                                                                                                        | 2                  |
| Participants              | 6      | (a) <i>Cohort study</i> —Give the eligibility criteria, and the sources and methods of selection of participants. Describe methods of follow-up<br><i>Case-control study</i> —Give the eligibility criteria, and the sources and methods of case ascertainment and control selection. Give the rationale for the choice of cases and controls<br><i>Cross-sectional study</i> —Give the eligibility criteria, and the sources and methods of selection of participants | 3                  |
|                           |        | (b) <i>Cohort study</i> —For matched studies, give matching criteria and number of exposed and unexposed<br><i>Case-control study</i> —For matched studies, give matching criteria and the number of controls per case                                                                                                                                                                                                                                                 |                    |
| Variables                 | 7      | Clearly define all outcomes, exposures, predictors, potential confounders, and effect modifiers. Give diagnostic criteria, if applicable                                                                                                                                                                                                                                                                                                                               | 3                  |
| Data sources/ measurement | 8*     | For each variable of interest, give sources of data and details of methods of assessment (measurement). Describe comparability of assessment methods if there is more than one group                                                                                                                                                                                                                                                                                   | 3                  |
| Bias                      | 9      | Describe any efforts to address potential sources of bias                                                                                                                                                                                                                                                                                                                                                                                                              |                    |
| Study size                | 10     | Explain how the study size was arrived at                                                                                                                                                                                                                                                                                                                                                                                                                              | 2                  |
| Quantitative variables    | 11     | Explain how quantitative variables were handled in the analyses. If applicable, describe which groupings were chosen and why                                                                                                                                                                                                                                                                                                                                           |                    |
| Statistical methods       | 12     | (a) Describe all statistical methods, including those used to control for confounding                                                                                                                                                                                                                                                                                                                                                                                  | 3                  |
|                           |        | (b) Describe any methods used to examine subgroups and interactions                                                                                                                                                                                                                                                                                                                                                                                                    | 4                  |
|                           |        | (c) Explain how missing data were addressed                                                                                                                                                                                                                                                                                                                                                                                                                            |                    |
|                           |        | (d) <i>Cohort study</i> —If applicable, explain how loss to follow-up was addressed<br><i>Case-control study</i> —If applicable, explain how matching of cases and controls was addressed<br><i>Cross-sectional study</i> —If applicable, describe analytical methods taking account of sampling strategy                                                                                                                                                              |                    |

|                          |     |                                                                                                                                                                                                                                                                                                                                                                                                               |   |
|--------------------------|-----|---------------------------------------------------------------------------------------------------------------------------------------------------------------------------------------------------------------------------------------------------------------------------------------------------------------------------------------------------------------------------------------------------------------|---|
|                          |     | (e) Describe any sensitivity analyses                                                                                                                                                                                                                                                                                                                                                                         |   |
| <b>Results</b>           |     |                                                                                                                                                                                                                                                                                                                                                                                                               |   |
| Participants             | 13* | (a) Report numbers of individuals at each stage of study—eg numbers potentially eligible, examined for eligibility, confirmed eligible, included in the study, completing follow-up, and analysed<br>(b) Give reasons for non-participation at each stage<br>(c) Consider use of a flow diagram                                                                                                               |   |
| Descriptive data         | 14* | (a) Give characteristics of study participants (eg demographic, clinical, social) and information on exposures and potential confounders<br>(b) Indicate number of participants with missing data for each variable of interest<br>(c) <i>Cohort study</i> —Summarise follow-up time (eg, average and total amount)                                                                                           | 3 |
| Outcome data             | 15* | <i>Cohort study</i> —Report numbers of outcome events or summary measures over time<br><i>Case-control study</i> —Report numbers in each exposure category, or summary measures of exposure<br><i>Cross-sectional study</i> —Report numbers of outcome events or summary measures                                                                                                                             | 3 |
| Main results             | 16  | (a) Give unadjusted estimates and, if applicable, confounder-adjusted estimates and their precision (eg, 95% confidence interval). Make clear which confounders were adjusted for and why they were included<br>(b) Report category boundaries when continuous variables were categorized<br>(c) If relevant, consider translating estimates of relative risk into absolute risk for a meaningful time period |   |
| Other analyses           | 17  | Report other analyses done—eg analyses of subgroups and interactions, and sensitivity analyses                                                                                                                                                                                                                                                                                                                | 4 |
| <b>Discussion</b>        |     |                                                                                                                                                                                                                                                                                                                                                                                                               |   |
| Key results              | 18  | Summarise key results with reference to study objectives                                                                                                                                                                                                                                                                                                                                                      | 8 |
| Limitations              | 19  | Discuss limitations of the study, taking into account sources of potential bias or imprecision. Discuss both direction and magnitude of any potential bias                                                                                                                                                                                                                                                    | 8 |
| Interpretation           | 20  | Give a cautious overall interpretation of results considering objectives, limitations, multiplicity of analyses, results from similar studies, and other relevant evidence                                                                                                                                                                                                                                    | 8 |
| Generalisability         | 21  | Discuss the generalisability (external validity) of the study results                                                                                                                                                                                                                                                                                                                                         | 8 |
| <b>Other information</b> |     |                                                                                                                                                                                                                                                                                                                                                                                                               |   |
| Funding                  | 22  | Give the source of funding and the role of the funders for the present study and, if applicable, for the original study on which the present article is based                                                                                                                                                                                                                                                 | 9 |

\*Give information separately for cases and controls in case-control studies and, if applicable, for exposed and unexposed groups in cohort and cross-sectional studies.  
**Note:** An Explanation and Elaboration article discusses each checklist item and gives methodological background and published examples of transparent reporting. The STROBE checklist is best used in conjunction with this article (freely available on the Web sites of PLoS Medicine at <http://www.plosmedicine.org/>, Annals of Internal Medicine at <http://www.annals.org/>, and Epidemiology at <http://www.epidem.com/>). Information on the STROBE Initiative is available at [www.strobe-statement.org](http://www.strobe-statement.org).

# BMJ Open

## Migration status and prevalence of diabetes and hypertension in Gauteng province, South Africa: effect modification by demographic and socio-economic characteristics-A cross-sectional population-based study

|                                 |                                                                                                                                                                                     |
|---------------------------------|-------------------------------------------------------------------------------------------------------------------------------------------------------------------------------------|
| Journal:                        | <i>BMJ Open</i>                                                                                                                                                                     |
| Manuscript ID                   | bmjopen-2018-027427.R1                                                                                                                                                              |
| Article Type:                   | Original research                                                                                                                                                                   |
| Date Submitted by the Author:   | 25-Jun-2019                                                                                                                                                                         |
| Complete List of Authors:       | Motlhale, Melitah; University of the Witwatersrand School of Public Health, School of Public Health<br>Ncayiyana, Jabulani; University of Cape Town, Epidemiology and Biostatistics |
| <b>Primary Subject Heading</b>: | Epidemiology                                                                                                                                                                        |
| Secondary Subject Heading:      | Public health                                                                                                                                                                       |
| Keywords:                       | migration status, prevalence, diabetes, Hypertension < CARDIOLOGY, Gauteng province, PUBLIC HEALTH                                                                                  |
|                                 |                                                                                                                                                                                     |

SCHOLARONE™  
Manuscripts

# Migration status and prevalence of diabetes and hypertension in Gauteng province, South Africa: effect modification by demographic and socio-economic characteristics- A cross-sectional population-based study

Melitah Motlhale<sup>1</sup>, Jabulani R. Ncayiyana<sup>1, 2</sup>

\* Correspondence: motlhalemelitah@gmail.com

<sup>1</sup>Division of Epidemiology and Biostatistics, School of Public Health, Faculty of Health Sciences, University of the Witwatersrand, Johannesburg, South Africa.

<sup>2</sup>Division of Epidemiology and Biostatistics, School of Public Health and Family Medicine, Faculty of Health Sciences, University of Cape Town, Cape Town, South Africa.

## Abstract

**Introduction:** Evidence from developing countries suggests that migration status has an impact on health. However, little is known about the effect that migration status has on morbidity in sub-Saharan Africa. The aim of this study is to investigate the association between migration status and hypertension and diabetes and to assess whether the association was modified by demographic and socio-economic characteristics.

**Methods:** A Quality of Life survey conducted in 2015 collected data on migration status and morbidity from a sample of 28,007 adults in 508 administrative wards in Gauteng province. Migration status was divided into three groups: non-migrant if born in Gauteng province, internal migrant if born in other South African provinces, and external migrant if born outside of South Africa. Diabetes and hypertension were defined based on self-reported clinical diagnosis. We applied a recently developed original, stepwise-multilevel logistic regression of discriminatory accuracy to investigate the association between migration status and hypertension and diabetes. Potential effect modification by age, sex, race, SES and ward-level deprivation on the association between migration status and morbidities was tested.

**Results:** Migrants have lower prevalence of diabetes and hypertension. In multilevel models, migrants had lower odds of reporting hypertension than internal migrants (OR = 0.86 95%CI: 0.78-0.95) and external migrant (OR = 0.60; 95%CI: 0.49-0.75). Being a migrant was also associated with lower diabetes prevalence than being an internal migrant (OR = 0.84; 95%CI: 0.75-0.94) and external migrant (OR = 0.53; 95%CI: 0.41-0.68). Age, race and SES were significant effect modifiers of the association between migration status and morbidities. There was also substantial residual between-ward variance in hypertension and diabetes with median odds ratio of 1.61 and 1.24, respectively.

**Conclusions:** Migration status is associated with prevalence of two non-communicable conditions. The association was modified by age, race and SES. Ward-level effects also explain differences in association.

**Keywords:** migration status, prevalence, diabetes, hypertension and Gauteng province.

## Strengths and limitations of this study

- The study population is part of a provincial representative sample on quality of life of adult residents in Gauteng province.
- The association between migration and health was analysed by applying, stepwise-multilevel logistic regression of discriminatory accuracy.
- Migrants (both internal and external) had lower odds of both hypertension and diabetes than people born in Gauteng province.
- Effect of migration status on health differed by age, race and SES.
- However, residual confounding is possible due to data availability.

## Introduction

Migration status is one of the important socioeconomic determinants of health [1]. Migration is also associated with profound social, economic and cultural changes, which may affect the migrant's health [2]. Post the year 2005, more than 62% of the South African population were living in urban areas, with the rapid urbanization being attributed to migration [3, 4]. The rapid urbanization and increase in the urban poor in metropolitan areas of Gauteng province, South Africa has become a major public health concern due to its linkage with increased disease burden [5, 6].

Migrants are heterogeneous both in their origin status and migration histories. Gauteng province attracts both internal and external migrants [3, 4]. Several studies on migration and morbidities have been done worldwide [1, 2, 7]. Morbidities often present with low functioning level, poorer quality of life, increased health care utilization and mortality rates [7]. The age standardized global prevalence of diabetes has nearly doubled since 1980, from 4.7% to 8.5% in the adult population in 2014 [8]. In 2010, 31% of the global adult population had hypertension [9]. The first South African National Health and Nutrition Examination Survey (SANHANES) reported the prevalence of 19.4% and 25.7% for diabetes and hypertension respectively in Gauteng province [10]. However, little is known about the prevalence of these morbidities among different migrant status. The prevalence of diabetes and hypertension in Gauteng province is high. Gauteng provides is home to many migrants. Therefore, a better understanding of the differences in morbidities according to different migration status is needed to target high risk groups in provision of services and to arrest the growing burden of certain diseases.

## Study objectives

The study aims to:

- Investigate the association between morbidities and migration status in Gauteng province, South Africa.
- To assess whether the association was modified by demographic and socio-economic characteristics.

## Methods

### Study setting

Gauteng is the province with the largest population, estimated to be 12,272263, despite having the smallest area; thus, it has the highest population density in South Africa of 675 people per km<sup>2</sup> [11]. According to data from Census 2011 Gauteng province accounted for the highest concentration of international and internal migrants in South Africa, approximately 7.4% and 44% respectively [12]. The study population consists of all people residing permanently in Gauteng province who were aged 18 or older in 2015.

### Data sources

We used data from the fourth Quality of Life (QoL) survey conducted by Gauteng City Region Observatory (GCRO) in Gauteng province in 2015. The QoL survey has been conducted every 2 years since 2009 with the intention of providing up-to-date information on 'a fast growing and dynamic urban region' to support 'better planning and management, and improved co-operative government relations' [13]. QoL survey measured a wide range of variables including socio-demographic variables, migration status and self-reported health status from a sample of 28,007 adults in 508 administrative wards in Gauteng province. The data on ward-level migrant African population, African population, migrant SADC population, employed

1  
2  
3 population, no income population, deprivation index (sampi) and average household size was  
4 obtained from Statistics South Africa (StatsSA).  
5

### 6 **Survey design**

7 Simple random sampling was employed to select the respondents. Gauteng province consists  
8 of 10 municipalities and it is subdivided into 508 wards. Within these wards, there are Small  
9 Area Levels (SALs) which were derived from the Population Census Enumerator Area (EA)  
10 polygons. SAL codes and geography were derived from the Statistics South Africa Census  
11 2011 report. The simple random sampling method was used to select the SALs from each  
12 ward, and then the minimum numbers of interviews for each ward were 30 and 60 interviews  
13 for those falling in district municipalities and metropolitan municipalities, respectively. The end  
14 result was that across the 508 wards, 28,456 successful interviews were completed, and these  
15 interviews were distributed across 16,400 SALs out of a total of 17,840 SALs. The 'NEXT'  
16 birthday method was used to select the respondents from the selected households. Data were  
17 collected via a digital data collection instrument using an open source system called Formhub  
18 and administered on a tablet device. Questionnaires were administered in the field and  
19 uploaded using Internet connectivity to a cloud server from where they could be accessed and  
20 downloaded online.  
21  
22

### 23 **Patient and Public Involvement**

24 The development of the research questions and outcome measures were not informed by  
25 patients' priority experiences and preferences. Patients were not involved in the design of this  
26 study. Patients were not involved in the recruitment and conduct of the study. This study used  
27 data from 2015 QoL survey which measured a wide range of variables including socio-  
28 demographic variables, migration status and self-reported health status.  
29

### 30 **Outcome and independent variables**

31 The main outcomes were hypertension and diabetes. The information on disease status, such  
32 as diabetes, hypertension, HIV, TB, Influenza, and others, was collected in the QoL survey by  
33 asking question: "In the past 12 months, have you been told by health provider that you have  
34 one or more of the following conditions. The morbidities were binary variables measuring the  
35 presence of the different morbidities, coded as 1 (or 'yes') if the respondents self-reported the  
36 morbidity and as 0 (or 'no') if the respondent did not report the presence of a given morbidity.  
37  
38

39 Migration status was derived from the following QoL survey questions: (i) "*Were you born in*  
40 *Gauteng province or did you move into Gauteng province from another province or country?*";  
41 (ii) "*When (year) did you move into Gauteng province?*"; (iii) "*Did you move to Gauteng province*  
42 *from a province in South Africa or from another country?*"; (iv) "*From which province did you*  
43 *move from into Gauteng province?*"; and (v) "*Which country did you move into Gauteng province*  
44 *from?*". Migration status then was divided into three groups: non-migrant, internal migrant, and  
45 external migrant. The explanatory variables included sex, age, race, education, employment  
46 status, dwelling, total household income, grow own vegetables, medical aid, physical activity,  
47 household size, household food security and socioeconomic status quintile. Information  
48 collected included demographic and socio-economic variables: sex (female, male); age (18  
49 years and above); race (African, Coloured, Indian/Asian, White and Other); Education was  
50 categorized into 'No formal education', grades R-7 'Primary only', grades 8-11 'Secondary  
51 incomplete', 'Matric' grade 12 'More' Tertiary and above and 'Unspecified' for those who didn't  
52 specify; employment status ('employed', 'unemployed and other').  
53  
54

55 Dwelling (formal, informal and other); Total household income was categorized into 'Lower  
56 class income' (< 6400 Rand [ZAR] per month), 'Middle class income' (R6400 - R51, 200 per  
57 month) and 'Upper class income' (> R51, 200 per month); grow own vegetables (do not grow  
58 own vegetables and grow their own vegetables); Medical insurance was categorized into  
59 'medically insured' for respondents with either medical aid or a hospital plan and 'medically  
60 not insured' for respondents without any of these; physical activity (never, hardly ever, few



times a month, few times a week and everyday); household size (1-3, 4-6 and 7+); household food security (never, seldom, sometimes, often and always) and socioeconomic status quintile (richest, 2<sup>nd</sup>, 3<sup>rd</sup>, 4<sup>th</sup> and poorest). The ward level variables included migrant African population, African population, migrant SADC population, employed population, no income population, sampi and household of less than three.

## Analysis

Descriptive analysis was performed to describe the migration status of the community by socio demographic characteristics of study respondents using proportions. The prevalence of morbidities in Gauteng province, South Africa was estimated using proportions and presented as percentages with 95% confidence intervals. Prevalence of morbidities was stratified by age, gender and migration status.

In the present analysis the data used was in multilevel structure as the respondents were within administrative wards [14]. We applied a recently developed original, stepwise-multilevel logistic regression of discriminatory accuracy to investigate the effect of migration status. We fitted separate models for effect of migration status and diabetes and hypertension, respectively. Four progressively adjusted multilevel models were carried out: model 0 with no covariates; model 1 including only sociodemographic characteristics at the individual level; model 2 additionally analysing municipal deprivation as contextual variable and model 3 is the full adjusted model. The models were adjusted for years in GP, age, sex, race, dwelling, education level, household size, household head, physical activity, medical aid, grow own vegetables, household food security, sampi, year moved to GP and socioeconomic status quintile. Potential effect modification by age, sex, race, SES and sampi was tested.

To take account of the hierarchical data structure (level 1: individuals; level 2: administrative wards), an Intraclass Correlation Coefficient (ICC) and ward-level variances were reported for every model and for reasons of better interpretability, ward-level variances were converted into median ORs (MORs) by applying the formula of Merlo *et al*, [14, 15]. Multilevel logistic regression analyses with administrative wards as random intercepts were performed calculating ORs with their 95% CIs. ORs were plotted using the user-written *coefplot* Stata command [16]. All analysis was performed using Stata version 13 (Stata Corporation, College Station, Texas, USA).

## Results

Most respondents were non-migrants 18,027 (64%) and the external migrants constituted only 8% of the total respondents. Of the total study population of 28,007 respondents 14,966 (53%) were female (**Table 1**). The majority of the respondents were aged between 18 to 27 years and were African 22,560 (81%). Most respondents 9,152 (33%) had matric level of education and only 443 (1.6%) had no formal education. Close to half of the respondents were employed 13,582 (49%). The majority of the respondents stayed in formal dwellings 24,043 (86%). A large proportion of the respondents fall under the lower income bracket based on their total household income 13,015 (71%) lower class was defined in this study as families with a total household income of less than R6,400 per month while 2.3% fall under the upper class (Upper class is a family with an income more than R51,200). Few respondents reported growing their own vegetables 3,480 (12%).

Table 1: Demographic characteristics across migration status

| Variable  | Level  | Non- migrants | Internal migrants | External migrants | Total          |
|-----------|--------|---------------|-------------------|-------------------|----------------|
| Sex       | Female | 9,746 (54.06) | 4,226 (54.05)     | 994 (46.00)       | 14,966 (53.44) |
|           | Male   | 8,281 (45.94) | 3,593 (45.95)     | 1,167 (54.00)     | 13,041 (46.56) |
| Age group | 18-27  | 5,288 (29.33) | 2,205 (28.20)     | 701 (32.44)       | 8,194 (29.26)  |

|                     |                        |                |               |               |                |
|---------------------|------------------------|----------------|---------------|---------------|----------------|
|                     | 28-37                  | 4,400 (24.41)  | 2,197 (28.10) | 781 (36.14)   | 7,378 (26.34)  |
|                     | 38-47                  | 3,362 (18.65)  | 1,507 (19.27) | 347 (16.06)   | 5,216 (18.62)  |
|                     | 48-57                  | 2,456 (13.62)  | 938 (12.00)   | 159 (7.36)    | 3,553 (12.69)  |
|                     | 58-67                  | 1,493 (8.28)   | 503 (6.43)    | 84 (3.89)     | 2,080 (7.43)   |
|                     | 68+                    | 1,028 (5.70)   | 469 (6.00)    | 89 (4.12)     | 1,586 (5.66)   |
| Race                | African                | 13,819 (76.66) | 6,901 (88.26) | 1 840 (85.15) | 22,560 (80.55) |
|                     | Coloured               | 940 (5.21)     | 180 (2.30)    | 9 (0.42)      | 1,129 (4.03)   |
|                     | Indian/Asian           | 389 (2.16)     | 154 (1.97)    | 75 (3.47)     | 618 (2.21)     |
|                     | White                  | 2,848 (15.80)  | 575 (7.35)    | 157 (7.27)    | 3,580 (12.78)  |
|                     | Other                  | 31 (0.17)      | 9 (0.12)      | 80 (3.70)     | 120 (0.43)     |
| Education           | No education           | 223 (1.25)     | 162 (2.10)    | 58 (2.72)     | 443 (1.60)     |
|                     | Primary only           | 1,621 (9.09)   | 1,029 (13.32) | 368 (17.23)   | 3,018 (10.90)  |
|                     | Secondary incomplete   | 5,007 (28.08)  | 2,451 (31.73) | 712 (33.33)   | 8,170 (29.50)  |
|                     | Matric                 | 6,210 (34.83)  | 2,468 (31.95) | 474 (22.19)   | 9,152 (33.05)  |
|                     | More                   | 4,399 (24.67)  | 1,526 (19.76) | 419 (19.62)   | 6,344 (22.91)  |
|                     | Unspecified            | 371 (2.08)     | 88 (1.14)     | 105 (4.92)    | 564 (2.04)     |
| Employment status   | Employed               | 8,426 (47.08)  | 3,838 (49.48) | 1,318 (61.47) | 13,582 (48.86) |
|                     | Unemployed             | 4,808 (26.86)  | 2,282 (29.42) | 444 (20.71)   | 7,534 (27.10)  |
|                     | Other                  | 4,664 (26.06)  | 1,636 (21.09) | 382 (17.82)   | 6,682 (24.04)  |
| Dwelling            | Formal                 | 16,478 (91.41) | 5,954 (76.15) | 1,611 (74.55) | 24,043 (85.85) |
|                     | Informal               | 1,442 (8.00)   | 1,659 (21.22) | 482 (22.30)   | 3,583 (12.79)  |
|                     | Other                  | 107 (0.59)     | 206 (2.63)    | 68 (3.15)     | 381 (1.36)     |
| Total HH Income     | Lower Class            | 7,991 (68.85)  | 4,000 (75.03) | 1,024 (72.21) | 13,015 (70.90) |
|                     | Middle Class           | 3,325 (28.65)  | 1,246 (23.37) | 356 (25.11)   | 4,927 (26.84)  |
|                     | Upper class            | 291 (2.51)     | 85 (1.59)     | 38 (2.68)     | 414 (2.26)     |
| Grow own vegetables | Do not grow vegetables | 15,850 (87.92) | 6,772 (86.61) | 1,905 (88.15) | 24,527 (87.57) |
|                     | Grow vegetables        | 2,177 (12.08)  | 1,047 (13.39) | 256 (11.85)   | 3,480 (12.43)  |
| Medical Aid         | No medical insurance   | 12,219 (71.26) | 5,883 (78.44) | 1,707 (82.66) | 19,809 (74.16) |
|                     | Medical insurance      | 4,927 (28.74)  | 1,617 (21.56) | 358 (17.34)   | 6,902 (25.84)  |
| Physical activity   | Never                  | 4,478 (25.11)  | 2,481 (32.12) | 684 (32.02)   | 7,643 (27.60)  |
|                     | Hardly ever            | 2,357 (13.22)  | 934 (12.09)   | 271 (12.69)   | 3,562 (12.86)  |
|                     | Few times a month      | 2,447 (13.72)  | 851 (11.02)   | 202 (9.46)    | 3,500 (12.64)  |
|                     | Few times a week       | 4,356 (24.43)  | 1,687 (21.84) | 445 (20.83)   | 6,488 (23.43)  |
|                     | Everyday               | 4,193 (23.52)  | 1,771 (22.93) | 534 (25.00)   | 6,498 (23.47)  |
| HH size             | 1-3                    | 9,167 (51.41)  | 4,451 (57.63) | 1,491 (69.80) | 15,109 (54.56) |
|                     | 4-6                    | 6,736 (37.78)  | 2,631 (34.06) | 562 (26.31)   | 9,929 (35.86)  |
|                     | 7+                     | 1,928 (10.81)  | 642 (8.31)    | 83 (3.89)     | 2,653 (9.58)   |
| HH Food security    | Never                  | 14,372 (79.72) | 6,095 (77.95) | 1,813 (83.90) | 22,280 (79.55) |
|                     | Seldom                 | 1,138 (6.31)   | 496 (6.34)    | 110 (5.09)    | 1,744 (6.23)   |
|                     | Sometimes              | 2,008 (11.14)  | 993 (12.70)   | 199 (9.21)    | 3,200 (11.43)  |
|                     | Often                  | 345 (1.91)     | 147 (1.88)    | 23 (1.06)     | 515 (1.84)     |
|                     | Always                 | 164 (0.91)     | 88 (1.13)     | 16 (0.74)     | 268 (0.96)     |
| SES quintiles       | Richest                | 2,716 (15.15)  | 2,136 (27.81) | 661 (31.12)   | 5,513 (19.88)  |

|                       |                          |               |               |             |               |
|-----------------------|--------------------------|---------------|---------------|-------------|---------------|
|                       | 2 <sup>nd</sup> quintile | 3,549 (19.79) | 1,608 (20.93) | 398 (18.74) | 5,555 (20.03) |
|                       | 3 <sup>rd</sup> quintile | 3,627 (20.23) | 1,498 (19.50) | 368 (17.33) | 5,493 (19.81) |
|                       | 4 <sup>th</sup> quintile | 3,972 (22.15) | 1,293 (16.83) | 346 (16.29) | 5,611 (20.23) |
|                       | Poorest                  | 4,066 (22.68) | 1,146 (14.92) | 351 (16.53) | 5,563 (20.06) |
| Year moved to Gauteng | After 2009               |               | 1,543 (19.74) | 673 (31.14) | 2,216 (22.21) |
|                       | 2005-2009                |               | 1,242 (15.89) | 589 (27.26) | 1,831 (18.35) |
|                       | 1995-2004                |               | 2,524 (32.28) | 519 (24.02) | 3,043 (30.49) |
|                       | 1985-1994                |               | 1,290 (16.50) | 217 (10.04) | 1,507 (15.10) |
|                       | Before 1985              |               | 1,219 (15.59) | 163 (7.54)  | 1,382 (13.85) |

### The prevalent morbidities in Gauteng province

The overall prevalence of hypertension and diabetes was 15.5% (95% CI: 15.1-15.9), 11.2% (95% CI: 10.8-11.6), respectively (**Table 2**). The prevalence of hypertension and diabetes was higher among non-migrants.

Table 2: Prevalence of hypertension and diabetes

| Characteristics         | Hypertension % (95% CI) | Diabetes % (95% CI) |
|-------------------------|-------------------------|---------------------|
| <b>Overall</b>          | 15.5 (15.1 - 15.9)      | 11.2 (10.8 - 11.6)  |
| <b>Age group years</b>  |                         |                     |
| 18-27                   | 11.3 (10.5 - 12.1)      | 8.4 (7.7 - 9.1)     |
| 28-37                   | 8.7 (8.1 - 9.4)         | 6.3 (5.7 - 6.8)     |
| 38-47                   | 11.8 (11.0 - 12.6)      | 9.0 (8.3 - 9.7)     |
| 48-57                   | 21.1 (19.9 - 22.5)      | 14.6 (13.5 - 15.8)  |
| 58-67                   | 32.2 (30.3 - 34.1)      | 21.4 (19.7 - 23.1)  |
| 68+                     | 39.8 (37.5 - 42.2)      | 30.5 (28.3 - 32.7)  |
| <b>Sex</b>              |                         |                     |
| Male                    | 12.1 (11.5 - 12.7)      | 10.1 (9.6 - 10.6)   |
| Female                  | 18.5 (17.9 - 19.1)      | 12.1 (11.7 - 12.7)  |
| <b>Migration status</b> |                         |                     |
| Non-migrant             | 16.8 (16.3 - 17.4)      | 12.6 (12.1 - 13.1)  |
| Internal migrant        | 14.4 (13.7 - 15.2)      | 9.7 (9.1 - 10.4)    |
| External migrant        | 8.1 (7.1 - 9.4)         | 5.1 (4.3 - 6.2)     |

Note: % = percentage, 95%CI = 95% Confidence Interval

### The effect of migration status on hypertension and diabetes

The effect of migration status on hypertension and diabetes based on analysis of multilevel logistic regression models is presented on **Table 3**. Three models were fitted, the first model only included the individual or household factors, the second model included ward factors and the final model included all factors. Compared to non-migrants, internal migrants and external migrants in the final model had reduced odds of self-reporting hypertension with the OR of 0.86 (95% CI: 0.78-0.95) and 0.60 (95% CI: 0.49-0.75) respectively. Being a migrant was also associated with lower risk of diabetes with OR of 0.84 (95% CI: 0.75-0.94) and 0.53 (95% CI: 0.41-0.68). While there was a reduction in the variance between the null and full models and ICC vary for both outcomes. There was substantial residual between-ward variance in hypertension and diabetes with median odds ratio of 1.31 and 1.14 respectively as presented in the final model.

Table 3: The effect of migration status on the most prevalent morbidities

| Characteristics     | Null Model | Model 1 <sup>a</sup> | Model 2 <sup>b</sup> | Model 3 <sup>c</sup> |
|---------------------|------------|----------------------|----------------------|----------------------|
|                     |            | OR (95% CI)          | OR (95% CI)          | OR (95% CI)          |
| <b>Hypertension</b> |            |                      |                      |                      |

| <b>Migration status</b>    |                  |                  |                  |                  |
|----------------------------|------------------|------------------|------------------|------------------|
| Non-migrant                |                  | 1.00             | 1.00             | 1.00             |
| Internal migrant           |                  | 0.85 (0.77-0.95) | 0.90 (0.83-0.97) | 0.86 (0.78-0.95) |
| External migrant           |                  | 0.59 (0.48-0.74) | 0.52 (0.44-0.61) | 0.60 (0.49-0.75) |
| <b>Random Effects</b>      |                  |                  |                  |                  |
| Between-ward variance (SE) | 0.25 (0.050)     | 0.15 (0.035)     | 0.10 (0.023)     | 0.08 (0.021)     |
| ICC                        | 0.07             | 0.04             | 0.03             | 0.02             |
| MOR                        | 1.61 (1.46-1.76) | 1.45 (1.33-1.57) | 1.35(1.26-1.44)  | 1.31 (1.22-1.40) |
| <b>Diabetes</b>            |                  |                  |                  |                  |
| <b>Migration status</b>    |                  |                  |                  |                  |
| Non-migrant                |                  | 1.00             | 1.00             | 1.00             |
| Internal migrant           |                  | 0.84 (0.75-0.94) | 0.77 (0.70-0.84) | 0.84 (0.75-0.94) |
| External migrant           |                  | 0.51 (0.40-0.66) | 0.41 (0.37-0.50) | 0.53 (0.41-0.68) |
| <b>Random Effects</b>      |                  |                  |                  |                  |
| Between-ward variance (SE) | 0.05 (0.014)     | 0.04 (0.015)     | 0.02 (0.007)     | 0.02 (0.011)     |
| ICC                        | 0.02             | 0.01             | 0.01             | 0.00             |
| MOR                        | 1.24 (1.17-1.31) | 1.22 (1.13-1.30) | 1.13 (1.07-1.19) | 1.14 (1.06-1.22) |

**Note:** OR = Odds ratio, 95%CI = 95% Confidence Interval, ICC = intraclass correlation coefficient, MOR = median odds ratio,

**Model 1<sup>a</sup>** = the individual/HH level factors, **Model 2<sup>b</sup>** = the Ward level factors and **Model 3<sup>c</sup>** = all factors.

To further assess effect modification of age, race and SES, we ran grade-stratified analysis. The association between migration status and hypertension is significantly modified by race. For Africans, migration status (both internal and external) was associated with lower odds of hypertension, while internal and external Asian migrants have higher odds of hypertension. From the interaction assessment between migration status and race, age group and socioeconomic status, respectively were found to be effect modifiers for hypertension (**Figure 1**) and diabetes (**Figure 2**).

**Figure 1: Association between migration status and hypertension, by SES, race and age group**

Figure shows SES-, race-, and age group-stratified, fully adjusted ORs in hypertension and associated 95% CIs.

**Figure 2: Association between migration status and diabetes, by SES, race, and age group**

Figure shows SES-, race-, and age group- stratified, fully adjusted ORs in diabetes and associated 95% CIs.

## Discussion

The findings from this study provide important information on migration status and the prevalence of morbidities among residents of 508 administrative wards in Gauteng province from a population-based survey. The study indicates that migration status is associated with prevalence hypertension and diabetes conditions. Internal and external migrants had lower odds of both hypertension and diabetes than people born in Gauteng province. Age, race and SES of the respondents were significant effect modifiers of the association between migration status and morbidities. The major strength of this study is that it assesses prevalence of morbidities and predictors of the most prevalent morbidities from a large population-based survey. The potential of the study was maximized and included the vulnerable population like migrants. The migrants made up 36% of the total respondents.

The most prevalent morbidities in Gauteng province were hypertension and diabetes at 15,5% and 11.2% respectively. The prevalence of diabetes in South Africa is increasing rapidly [17]. In 2009 it was approximately 9% among those aged 30 years and older [18]. Based on the population census the prevalence of diabetes was around 9% according to the International Diabetes Federation (IDF) [19, 20]. Hypertension was found to be around 14.0% for those aged 25 and older [21]. SANHANES reported slightly higher prevalence of diabetes (19.4%)

1  
2  
3 and hypertension (25.7%) [10]. Hypertension and diabetes were higher among non-migrants.  
4 The migrant population is believed to keep increasing in different countries; their heterogeneity  
5 becomes apparent with respect to the differences in the prevalence of diseases [7].  
6 Prevalence is likely to increase therefore, these findings can be used to inform future policy,  
7 planning and funding allocation to assist in controlling as well as managing different conditions  
8 [22].  
9

10 Migration status was associated with prevalence of two non-communicable conditions. Non-  
11 communicable diseases are the most common health problem and are the primary cause of  
12 death in many countries [23]. Research revealed that compared to native-born respondents,  
13 migrants reported better health [24]. This could be attributed to healthy migration effect,  
14 healthier individuals are more likely to migrate. This is consistent with our findings, migrants  
15 reported lower prevalence of diabetes and hypertension. Reasons for migration were not  
16 included in the questionnaire administered in the primary study; these might have a bearing  
17 on the prevalence of hypertension and diabetes among migrants in Gauteng province. Effect  
18 of migration status on health differed by age group, race and socio-economic status. Migrants  
19 might find themselves in a worse socioeconomic status, with less access to health care  
20 services, and experiencing greater linguistic and cultural barriers related to accessing health  
21 information, despite the conditions they tend to have better health profiles compared to the  
22 natives [25]. A number of studies have shown that this health advantage deteriorates over  
23 time and with successive generations [24, 26, 27]. There is a lack of studies on morbidity  
24 among migrants compared to natives [7]. This study clearly demonstrates a need for more  
25 research on migration and different morbidities.  
26  
27

### 28 **Strengths and limitations**

29 This study contributes to the pool of knowledge as little research has been done on migration  
30 status and morbidities in Gauteng province, South Africa. Assessment of predicts for the most  
31 prevalent morbidities was done from a very large population based representative sample  
32 survey. Therefore, the power of the study to detect significant associations was maximized.  
33 The respondents were selected by random sampling thus both internal and external validity of  
34 the study were improved. The study included the migrant population and little research has  
35 been done on the morbidities affecting this sub-population. A wide variety of socio-  
36 demographic factors were employed to assess their association with the two most prevalent  
37 morbidities.  
38  
39

40 The morbidities were self-reported thus prevalence might be underestimated. Self-reported  
41 data can be biased by differential access to healthcare services between groups of different  
42 socioeconomic status [28]. When self-reported information was compared with medical  
43 records or clinical measurements from health examination surveys in Colorado, Netherlands  
44 and 12 countries in Europe, self-reported information underestimated the prevalence of  
45 hypertension [29, 30]. It is worth noting that the results from these studies may not be valid for  
46 the South African context. This calls for more research on migration status and morbidities, as  
47 well as validity studies of self-reported morbidities in the South African setting.  
48  
49

50 Missing data of some important health-related information, might have resulted in residual  
51 confounding because of unmeasured potential confounders.  
52

### 53 **Conclusion**

54 Migration status is associated with two non-communicable conditions prevalent in Gauteng  
55 province. From the public health perspective, it is important to evaluate the prevalence of  
56 morbidities because the information can inform the development of prevention programme on  
57 a community level.  
58

### 59 **Acknowledgements**

1  
2  
3 The authors would like to thank Gauteng City-Region Observatory (GCRO) for providing us with the  
4 data to conduct the research.  
5

#### 6 **Author contributions**

7 Concept and design of the study: JN, Acquisition of data: JN, Analysis and interpretation of data: JN,  
8 MM, Drafting the manuscript: JN, MM, Revising the manuscript critically for important intellectual  
9 content: JN, MM and approval of the manuscript to be published: JN and MM  
10

#### 11 **Disclosure statement**

12 No potential conflict of interest was reported by the authors.  
13  
14

#### 15 **Ethics and Consent**

16 For the primary study ethics approval was obtained from the local ethics committee and the Human  
17 Research Ethics Committee of University of the Witwatersrand. All respondents provided informed  
18 consent before data collection. The study was granted ethics clearance by the Human Research Ethics  
19 Committee of University of the Witwatersrand.  
20

#### 21 **Data Availability Statement**

22 Data may be obtained from a third party and are not publicly available. The de-identified participant  
23 data are available from GCRO.  
24

#### 25 **Funding Information**

26 None.  
27  
28

29 **Word count:** 2657 (excluding title, abstract, reference, figures and tables,  
30 acknowledgements, author contribution, disclosure statement, ethics and consent and funding  
31 information).  
32  
33  
34  
35  
36  
37  
38  
39  
40  
41  
42  
43  
44  
45  
46  
47  
48  
49  
50  
51  
52  
53  
54  
55  
56  
57  
58  
59  
60



## References

1. Patra S, Bhise MD. Gender differentials in prevalence of self-reported non-communicable diseases (NCDs) in India: evidence from recent NSSO survey. *Journal of Public Health*. 2016;24(5):375-385.
2. Westman J, Martelin T, Härkänen T, Koskinen S, Sundquist K. Migration and self-rated health: a comparison between Finns living in Sweden and Finns living in Finland. *Scandinavian Journal of Public Health*. 2008;36(7):698-705.
3. Kok P, Collinson M. Migration and urbanization in South Africa. Pretoria, South Africa: Statistics South Africa, 2006.
4. Turok I. Urbanisation and development in South Africa: economic imperatives, spatial distortions and strategic responses. Pretoria, South Africa Environment Development United Nations Population Fund, 2012.
5. Grief MJ, Dodoo FN, Jayaraman A. Urbanisation, Poverty and Sexual behaviour: The tale of Five African cities. *Urban Studies*. 2011;48(5):947-957.
6. Thomas F, Haour-Knipe M, Aggleton P. Mobility, Sexuality and AIDS. New York, USA: Routledge; 2010.
7. Diaz E, Poblador-Pou B, Gimeno-Feliu L, Calderón-Larrañaga A, Kumar BN, Prados-Torres A. Multimorbidity and Its Patterns according to Immigrant Origin. A Nationwide Register-Based Study in Norway. *PLoS ONE* 2015;10(12):e0145233.
8. World Health Organization. Global status report on non-communicable diseases 2014. Geneva, World Health Organization, 2012.
9. Mills KT, Bundy JD, Kelly TN, Reed JE, Kearney PM, Reynolds K, et al. Global Disparities of Hypertension Prevalence and Control A Systematic Analysis of Population-Based Studies from 90 Countries. *Circulation*. 2016;134:441-450.
10. Shisana O, Labadarios D, Rehle T, Simbayi L, Zuma K, Dhansay A, et al. (2013) South African National Health and Nutrition Examination Survey (SANHANES-1). Cape Town: HSRC Press.
11. Gauteng City Region Observatory. GCRO Data Brief Key: Findings from Statistics South Africa's 2011 National Census for Gauteng. South Africa. Gauteng City Region Observatory, 2012.
12. Statistics South Africa. Statistical Release: Census 2011 South Africa. Pretoria, South Africa: Statistics South Africa 2012.
13. Gauteng City Region Observatory. Quality of life Survey Technical Report. Johannesburg, South Africa: Gauteng City Regional Observatory 2015.
14. Merlo J, Wagner P, Ghith N, Leckie G. An Original Stepwise Multilevel Logistic Regression Analysis of Discriminatory Accuracy: The Case of Neighbourhoods and Health. *PLoS ONE*. 2016;11(4):e0153778.
15. Adjaye-Gbewonyo K, Kawachi I, Subramanian SV, Avendano M. Income inequality and cardiovascular disease risk factors in a highly unequal country: a fixed-effects analysis from South Africa. *International Journal for Equity in Health*. 2018;17 (31):1-13.
16. Jann B. Plotting regression coefficients and other estimates. *The Stata Journal*. 2014; 14(4):708-737.
17. Pheiffer C, Pillay-van Wyk V, Joubert JD, Levitt N, Nglazi MD, Bradshaw D. The prevalence of type 2 diabetes in South Africa: a systematic review protocol. *BMJ Open* 2018;8:e021029.
18. Bertram MY, Jaswal AVS, Van Wyk VP, Levitt NS, Hofman KJ. The non-fatal disease burden caused by type 2 diabetes in South Africa, 2009. *Global Health Action*. 2013;6(1):19244.



19. International Diabetes Federation (IDF), Diabetes Atlas. Seventh Edition. Brussels, IDF. 2015.
20. Statistics South Africa (StatsSA). Mid-year population estimates 2015. 2015.
21. Statistics South Africa. Use of health facilities and levels of selected health conditions in South Africa: Findings from the General Household Survey, Pretoria, South Africa: Statistics South Africa 2013.
22. Keel S, Foreman J, Xie J, van Wijngaarden P, Taylor HR, Dirani M. The Prevalence of Self-Reported Diabetes in the Australian National Eye Health Survey. PLoS ONE. 2017;12(1):e0169211.
23. Teh JKL, Tey NP, Ng ST. Ethnic and Gender Differentials in Non-Communicable Diseases and Self-Rated Health in Malaysia. PLoS ONE. 2014;9:e91328.
24. Lee S, O'Neill AH, Ihara ES, Chae DH. Change in Self-Reported Health Status among Immigrants in the United States: Associations with Measures of Acculturation. PLoS ONE. 2013;8(10):e76494.
25. Frisbie WP, Cho Y, Hummer RA. Immigration and the health of Asian and Pacific Islander adults in the United States. American Journal of Epidemiology. 2001;153(4):372-380.
26. Antecol H, Bedard K. Unhealthy assimilation: Why do immigrants converge to American health status levels? Demography. 2006;43(2): 337-360. doi:10.1353/dem.2006.0011. PubMed: 16889132.
27. Singh GK, Miller BA. Health, Life Expectancy, and Mortality Patterns Among Immigrant Populations in the United States. Canadian Journal of Public Health. 2004; 95(3): 114-121. PubMed: 15191127.
28. Vellakkal S, Subramanian SV, Millett C, Basu S, Stuckler D, Ebrahim S. Socioeconomic Inequalities in Non-Communicable Diseases Prevalence in India: Disparities between Self-Reported Diagnoses and Standardized Measures. PLoS ONE 2013;8(7):e68219.
29. Tolonen H, Koponen P, Mindell JS, Männistö S, Giampaoli S, Dias CM, et al. Underestimation of obesity, hypertension and high cholesterol by self-reported data: comparison of self-reported information and objective measures from health examination surveys. European Journal of Public Health. 2014;24(6):941-8.
30. Molenaar EA, Van Ameijden EJ, Grobbee DE, Numans ME. Comparison of routine care self-reported and biometrical data on hypertension and diabetes: results of the Utrecht Health Project. European Journal of Public Health. 2007;17(2):199-205.

1  
2  
3  
4  
5  
6  
7  
8  
9  
10  
11  
12  
13  
14  
15  
16  
17  
18  
19  
20  
21  
22  
23  
24  
25  
26  
27  
28  
29  
30  
31  
32  
33  
34  
35  
36  
37  
38  
39  
40  
41  
42  
43  
44  
45  
46  
47  
48  
49  
50  
51  
52  
53  
54  
55  
56  
57  
58  
59  
60

For peer review only

1  
2  
3  
4  
5  
6  
7  
8  
9  
10  
11  
12  
13  
14  
15  
16  
17  
18  
19  
20  
21  
22  
23  
24  
25  
26  
27  
28  
29  
30  
31  
32  
33  
34  
35  
36  
37  
38  
39  
40  
41  
42  
43  
44  
45  
46  
47  
48  
49  
50  
51  
52  
53  
54  
55  
56  
57  
58  
59  
60

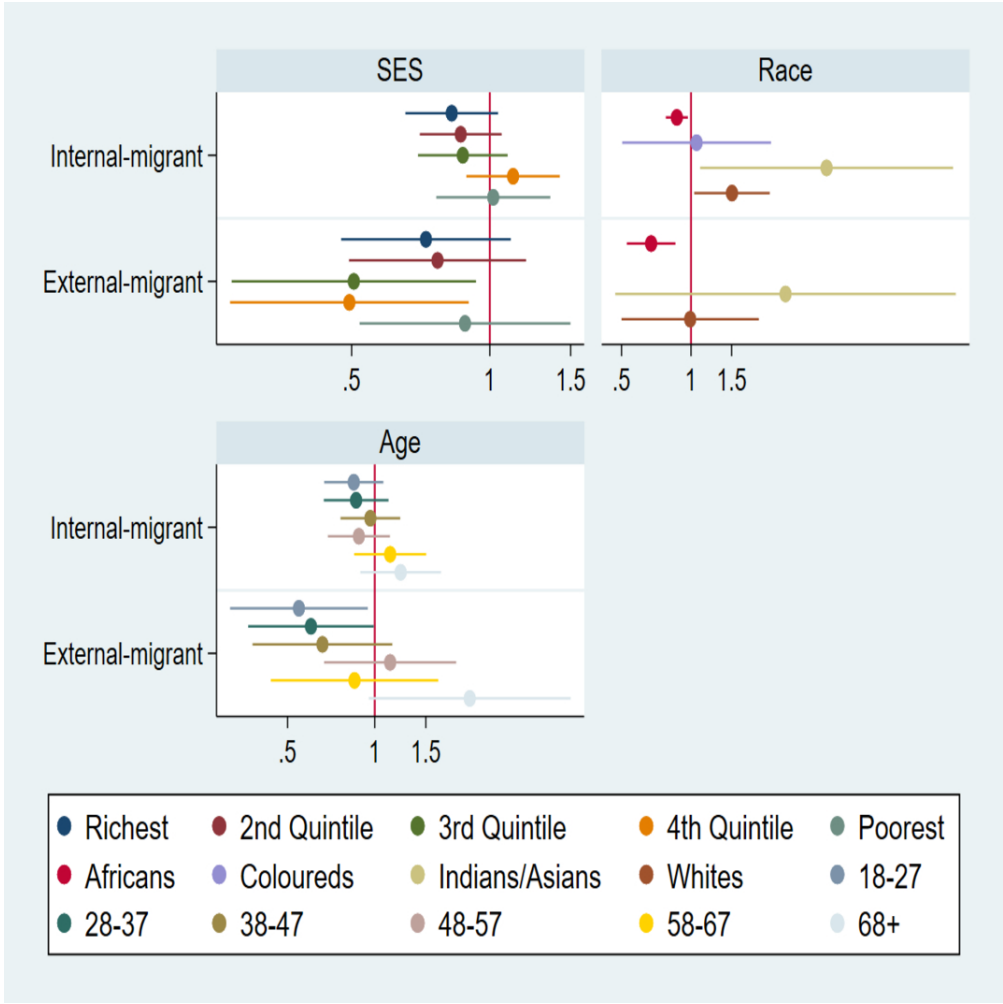

Association between migration status and hypertension, by SES, race and age group

90x90mm (300 x 300 DPI)

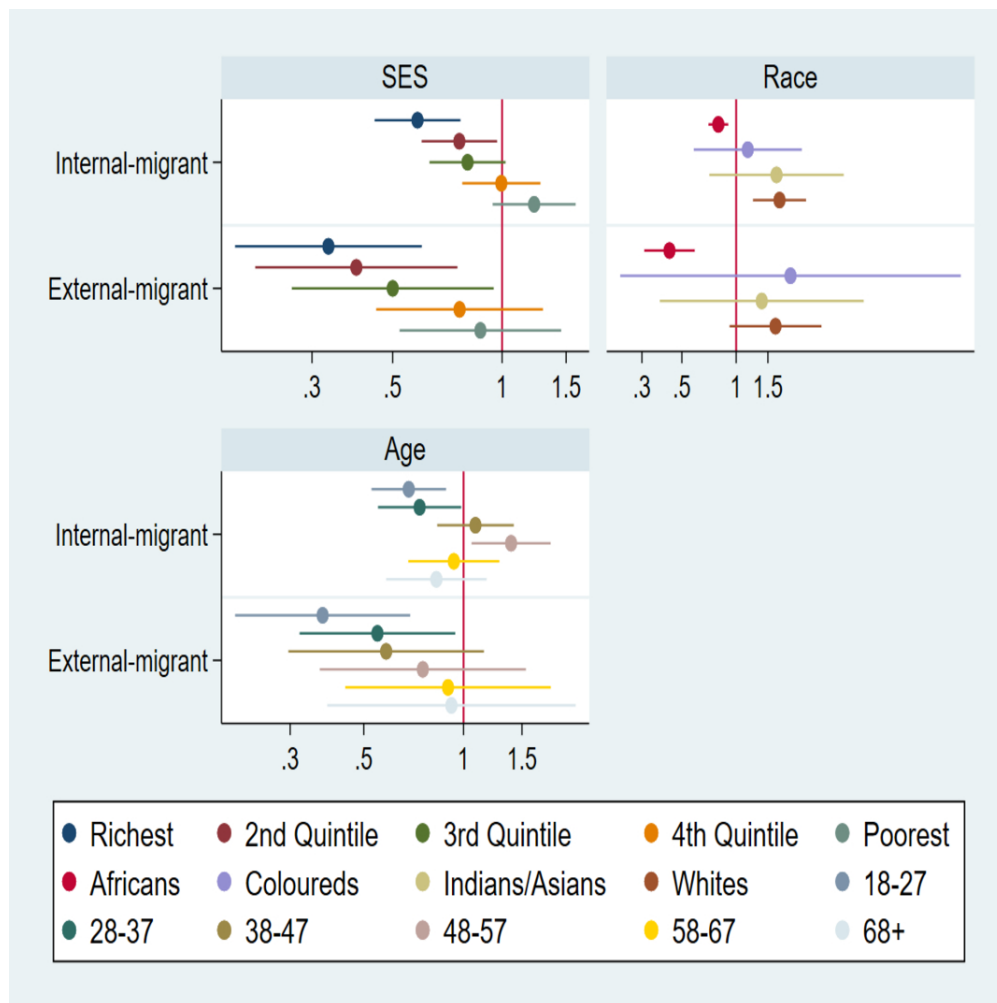

Association between migration status and diabetes, by SES, race, and age group

90x90mm (300 x 300 DPI)

**STROBE 2007 (v4) checklist of items to be included in reports of observational studies in epidemiology\***  
**Checklist for cohort, case-control, and cross-sectional studies (combined)**

| Section/Topic             | Item # | Recommendation                                                                                                                                                                                                                                                                                                                                                                                                                                                         | Reported on page # |
|---------------------------|--------|------------------------------------------------------------------------------------------------------------------------------------------------------------------------------------------------------------------------------------------------------------------------------------------------------------------------------------------------------------------------------------------------------------------------------------------------------------------------|--------------------|
| Title and abstract        | 1      | (a) Indicate the study's design with a commonly used term in the title or the abstract                                                                                                                                                                                                                                                                                                                                                                                 | 1                  |
|                           |        | (b) Provide in the abstract an informative and balanced summary of what was done and what was found                                                                                                                                                                                                                                                                                                                                                                    | 1                  |
| <b>Introduction</b>       |        |                                                                                                                                                                                                                                                                                                                                                                                                                                                                        |                    |
| Background/rationale      | 2      | Explain the scientific background and rationale for the investigation being reported                                                                                                                                                                                                                                                                                                                                                                                   | 2                  |
| Objectives                | 3      | State specific objectives, including any pre-specified hypotheses                                                                                                                                                                                                                                                                                                                                                                                                      | 2                  |
| <b>Methods</b>            |        |                                                                                                                                                                                                                                                                                                                                                                                                                                                                        |                    |
| Study design              | 4      | Present key elements of study design early in the paper                                                                                                                                                                                                                                                                                                                                                                                                                | 2                  |
| Setting                   | 5      | Describe the setting, locations, and relevant dates, including periods of recruitment, exposure, follow-up, and data collection                                                                                                                                                                                                                                                                                                                                        | 2                  |
| Participants              | 6      | (a) <i>Cohort study</i> —Give the eligibility criteria, and the sources and methods of selection of participants. Describe methods of follow-up<br><i>Case-control study</i> —Give the eligibility criteria, and the sources and methods of case ascertainment and control selection. Give the rationale for the choice of cases and controls<br><i>Cross-sectional study</i> —Give the eligibility criteria, and the sources and methods of selection of participants | 3                  |
|                           |        | (b) <i>Cohort study</i> —For matched studies, give matching criteria and number of exposed and unexposed<br><i>Case-control study</i> —For matched studies, give matching criteria and the number of controls per case                                                                                                                                                                                                                                                 |                    |
| Variables                 | 7      | Clearly define all outcomes, exposures, predictors, potential confounders, and effect modifiers. Give diagnostic criteria, if applicable                                                                                                                                                                                                                                                                                                                               | 3                  |
| Data sources/ measurement | 8*     | For each variable of interest, give sources of data and details of methods of assessment (measurement). Describe comparability of assessment methods if there is more than one group                                                                                                                                                                                                                                                                                   | 3                  |
| Bias                      | 9      | Describe any efforts to address potential sources of bias                                                                                                                                                                                                                                                                                                                                                                                                              |                    |
| Study size                | 10     | Explain how the study size was arrived at                                                                                                                                                                                                                                                                                                                                                                                                                              | 2                  |
| Quantitative variables    | 11     | Explain how quantitative variables were handled in the analyses. If applicable, describe which groupings were chosen and why                                                                                                                                                                                                                                                                                                                                           |                    |
| Statistical methods       | 12     | (a) Describe all statistical methods, including those used to control for confounding                                                                                                                                                                                                                                                                                                                                                                                  | 3                  |
|                           |        | (b) Describe any methods used to examine subgroups and interactions                                                                                                                                                                                                                                                                                                                                                                                                    | 4                  |
|                           |        | (c) Explain how missing data were addressed                                                                                                                                                                                                                                                                                                                                                                                                                            |                    |
|                           |        | (d) <i>Cohort study</i> —If applicable, explain how loss to follow-up was addressed<br><i>Case-control study</i> —If applicable, explain how matching of cases and controls was addressed<br><i>Cross-sectional study</i> —If applicable, describe analytical methods taking account of sampling strategy                                                                                                                                                              |                    |

|                          |     |                                                                                                                                                                                                                                                                                                                                                                                                               |   |
|--------------------------|-----|---------------------------------------------------------------------------------------------------------------------------------------------------------------------------------------------------------------------------------------------------------------------------------------------------------------------------------------------------------------------------------------------------------------|---|
|                          |     | (e) Describe any sensitivity analyses                                                                                                                                                                                                                                                                                                                                                                         |   |
| <b>Results</b>           |     |                                                                                                                                                                                                                                                                                                                                                                                                               |   |
| Participants             | 13* | (a) Report numbers of individuals at each stage of study—eg numbers potentially eligible, examined for eligibility, confirmed eligible, included in the study, completing follow-up, and analysed<br>(b) Give reasons for non-participation at each stage<br>(c) Consider use of a flow diagram                                                                                                               |   |
| Descriptive data         | 14* | (a) Give characteristics of study participants (eg demographic, clinical, social) and information on exposures and potential confounders<br>(b) Indicate number of participants with missing data for each variable of interest<br>(c) <i>Cohort study</i> —Summarise follow-up time (eg, average and total amount)                                                                                           | 3 |
| Outcome data             | 15* | <i>Cohort study</i> —Report numbers of outcome events or summary measures over time<br><i>Case-control study</i> —Report numbers in each exposure category, or summary measures of exposure<br><i>Cross-sectional study</i> —Report numbers of outcome events or summary measures                                                                                                                             | 3 |
| Main results             | 16  | (a) Give unadjusted estimates and, if applicable, confounder-adjusted estimates and their precision (eg, 95% confidence interval). Make clear which confounders were adjusted for and why they were included<br>(b) Report category boundaries when continuous variables were categorized<br>(c) If relevant, consider translating estimates of relative risk into absolute risk for a meaningful time period |   |
| Other analyses           | 17  | Report other analyses done—eg analyses of subgroups and interactions, and sensitivity analyses                                                                                                                                                                                                                                                                                                                | 4 |
| <b>Discussion</b>        |     |                                                                                                                                                                                                                                                                                                                                                                                                               |   |
| Key results              | 18  | Summarise key results with reference to study objectives                                                                                                                                                                                                                                                                                                                                                      | 8 |
| Limitations              | 19  | Discuss limitations of the study, taking into account sources of potential bias or imprecision. Discuss both direction and magnitude of any potential bias                                                                                                                                                                                                                                                    | 8 |
| Interpretation           | 20  | Give a cautious overall interpretation of results considering objectives, limitations, multiplicity of analyses, results from similar studies, and other relevant evidence                                                                                                                                                                                                                                    | 8 |
| Generalisability         | 21  | Discuss the generalisability (external validity) of the study results                                                                                                                                                                                                                                                                                                                                         | 8 |
| <b>Other information</b> |     |                                                                                                                                                                                                                                                                                                                                                                                                               |   |
| Funding                  | 22  | Give the source of funding and the role of the funders for the present study and, if applicable, for the original study on which the present article is based                                                                                                                                                                                                                                                 | 9 |

\*Give information separately for cases and controls in case-control studies and, if applicable, for exposed and unexposed groups in cohort and cross-sectional studies.  
**Note:** An Explanation and Elaboration article discusses each checklist item and gives methodological background and published examples of transparent reporting. The STROBE checklist is best used in conjunction with this article (freely available on the Web sites of PLoS Medicine at <http://www.plosmedicine.org/>, Annals of Internal Medicine at <http://www.annals.org/>, and Epidemiology at <http://www.epidem.com/>). Information on the STROBE Initiative is available at [www.strobe-statement.org](http://www.strobe-statement.org).

# BMJ Open

## Migration status and prevalence of diabetes and hypertension in Gauteng province, South Africa: effect modification by demographic and socio-economic characteristics-A cross-sectional population-based study

|                                 |                                                                                                                                                                                     |
|---------------------------------|-------------------------------------------------------------------------------------------------------------------------------------------------------------------------------------|
| Journal:                        | <i>BMJ Open</i>                                                                                                                                                                     |
| Manuscript ID                   | bmjopen-2018-027427.R2                                                                                                                                                              |
| Article Type:                   | Original research                                                                                                                                                                   |
| Date Submitted by the Author:   | 27-Aug-2019                                                                                                                                                                         |
| Complete List of Authors:       | Motlhale, Melitah; University of the Witwatersrand School of Public Health, School of Public Health<br>Ncayiyana, Jabulani; University of Cape Town, Epidemiology and Biostatistics |
| <b>Primary Subject Heading</b>: | Epidemiology                                                                                                                                                                        |
| Secondary Subject Heading:      | Public health                                                                                                                                                                       |
| Keywords:                       | migration status, prevalence, diabetes, Hypertension < CARDIOLOGY, Gauteng province, PUBLIC HEALTH                                                                                  |
|                                 |                                                                                                                                                                                     |

SCHOLARONE™  
Manuscripts



# Migration status and prevalence of diabetes and hypertension in Gauteng province, South Africa: effect modification by demographic and socio-economic characteristics- A cross-sectional population-based study

Melitah Motlhale<sup>1</sup>, Jabulani R. Ncayiyana<sup>1, 2</sup>

\* Correspondence: motlhalemelitah@gmail.com

<sup>1</sup>Division of Epidemiology and Biostatistics, School of Public Health, Faculty of Health Sciences, University of the Witwatersrand, Johannesburg, South Africa.

<sup>2</sup>Division of Epidemiology and Biostatistics, School of Public Health and Family Medicine, Faculty of Health Sciences, University of Cape Town, Cape Town, South Africa.

## Abstract

**Introduction:** Evidence from developing countries suggests that migration status has an impact on health. However, little is known about the effect that migration status has on morbidity in sub-Saharan Africa. The aim of this study is to investigate the association between migration status and hypertension and diabetes and to assess whether the association was modified by demographic and socio-economic characteristics.

**Methods:** A Quality of Life survey conducted in 2015 collected data on migration status and morbidity from a sample of 28,007 adults in 508 administrative wards in Gauteng province. Migration status was divided into three groups: non-migrant if born in Gauteng province, internal migrant if born in other South African provinces, and external migrant if born outside of South Africa. Diabetes and hypertension were defined based on self-reported clinical diagnosis. We applied a recently developed original, stepwise-multilevel logistic regression of discriminatory accuracy to investigate the association between migration status and hypertension and diabetes. Potential effect modification by age, sex, race, SES and ward-level deprivation on the association between migration status and morbidities was tested.

**Results:** Migrants have lower prevalence of diabetes and hypertension. In multilevel models, migrants had lower odds of reporting hypertension than internal migrants (OR = 0.86 95%CI: 0.78-0.95) and external migrant (OR = 0.60; 95%CI: 0.49-0.75). Being a migrant was also associated with lower diabetes prevalence than being an internal migrant (OR = 0.84; 95%CI: 0.75-0.94) and external migrant (OR = 0.53; 95%CI: 0.41-0.68). Age, race and SES were significant effect modifiers of the association between migration status and morbidities. There was also substantial residual between-ward variance in hypertension and diabetes with median odds ratio of 1.61 and 1.24, respectively.

**Conclusions:** Migration status is associated with prevalence of two non-communicable conditions. The association was modified by age, race and SES. Ward-level effects also explain differences in association.

**Keywords:** migration status, prevalence, diabetes, hypertension and Gauteng province.

## Strengths and limitations of this study

- The study population is part of a provincial representative sample on quality of life of adult residents in Gauteng province.
- The association between migration and health was analysed by applying, stepwise-multilevel logistic regression of discriminatory accuracy.
- Migrants (both internal and external) had lower odds of both hypertension and diabetes than people born in Gauteng province.
- Effect of migration status on health differed by age, race and SES.
- However, residual confounding is possible due to data availability.

## Introduction

Migration status is one of the important socioeconomic determinants of health [1]. Migration is also associated with profound social, economic and cultural changes, which may affect the migrant's health [2]. Post the year 2005, more than 62% of the South African population were living in urban areas, with the rapid urbanization being attributed to migration [3, 4]. The rapid urbanization and increase in the urban poor in metropolitan areas of Gauteng province, South Africa has become a major public health concern due to its linkage with increased disease burden [5, 6].

Migrants are heterogeneous both in their origin status and migration histories. Gauteng province attracts both internal and external migrants [3, 4]. Several studies on migration and morbidities have been done worldwide [1, 2, 7]. Morbidities often present with low functioning level, poorer quality of life, increased health care utilization and mortality rates [7]. The age standardized global prevalence of diabetes has nearly doubled since 1980, from 4.7% to 8.5% in the adult population in 2014 [8]. In 2010, 31% of the global adult population had hypertension [9].

The first South African National Health and Nutrition Examination Survey (SANHANES) reported the prevalence of 19.4% and 25.7% for diabetes and hypertension respectively in Gauteng province [10]. However, information on the prevalence of these morbidities among different migrant status in South Africa is scanty. The prevalence of diabetes and hypertension in Gauteng province is high. Gauteng provides is home to many migrants. Therefore, a better understanding of the differences in morbidities according to different migration status is needed to target high risk groups in provision of services and to arrest the growing burden of certain diseases.

## Study objectives

The study aims to:

- Investigate the association between morbidities and migration status in Gauteng province, South Africa.
- To assess whether the association was modified by demographic and socio-economic characteristics.

## Methods

### Study setting

Gauteng is the province with the largest population, estimated to be 12,272263, despite having the smallest area; thus, it has the highest population density in South Africa of 675 people per km<sup>2</sup> [11]. According to data from Census 2011 Gauteng province accounted for the highest concentration of international and internal migrants in South Africa, approximately 7.4% and 44% respectively [12]. The study population consists of all people residing permanently in Gauteng province who were aged 18 or older in 2015.

### Data sources

We used data from the fourth Quality of Life (QoL) Survey conducted by Gauteng City Region Observatory (GCRO) in Gauteng province in 2015. The QoL survey has been conducted every 2 years since 2009 with the intention of providing up-to-date information on 'a fast growing and dynamic urban region' to support 'better planning and management, and improved co-operative government relations' [13]. QoL survey measured a wide range of variables including socio-demographic variables, migration status and self-reported health status from a sample of 28,007 adults in 508 administrative wards in Gauteng province. The data on ward-level migrant African population, African population, migrant SADC population, employed

1  
2  
3 population, no income population, deprivation index (sampi) and average household size was  
4 obtained from Statistics South Africa (StatsSA).  
5

### 6 **Survey design**

7 Simple random sampling was employed to select the respondents. Gauteng province consists  
8 of 10 municipalities and it is subdivided into 508 wards. Within these wards, there are Small  
9 Area Levels (SALs) which were derived from the Population Census Enumerator Area (EA)  
10 polygons. SAL codes and geography were derived from the Statistics South Africa Census  
11 2011 report. The simple random sampling method was used to select the SALs from each  
12 ward, and then the minimum numbers of interviews for each ward were 30 and 60 interviews  
13 for those falling in district municipalities and metropolitan municipalities, respectively. The end  
14 result was that across the 508 wards, 28,456 successful interviews were completed, and these  
15 interviews were distributed across 16,400 SALs out of a total of 17,840 SALs. The 'NEXT'  
16 birthday method was used to select the respondents from the selected households. Data were  
17 collected via a digital data collection instrument using an open source system called Formhub  
18 and administered on a tablet device. Questionnaires were administered in the field and  
19 uploaded using Internet connectivity to a cloud server from where they could be accessed and  
20 downloaded online.  
21  
22

### 23 **Patient and Public Involvement**

24 The development of the research questions and outcome measures were not informed by  
25 patients' priority experiences and preferences. Patients were not involved in the design of this  
26 study. Patients were not involved in the recruitment and conduct of the study. This study used  
27 data from 2015 QoL survey which measured a wide range of variables including socio-  
28 demographic variables, migration status and self-reported health status.  
29

### 30 **Outcome and independent variables**

31 The main outcomes were hypertension and diabetes. The information on disease status, such  
32 as diabetes, hypertension, HIV, TB, Influenza, and others, was collected in the QoL survey by  
33 asking question: "In the past 12 months, have you been told by health provider that you have  
34 one or more of the following conditions. The morbidities were binary variables measuring the  
35 presence of the different morbidities, coded as 1 (or 'yes') if the respondents self-reported the  
36 morbidity and as 0 (or 'no') if the respondent did not report the presence of a given morbidity.  
37  
38

39 Migration status was derived from the following QoL survey questions: (i) "Were you born in  
40 Gauteng province or did you move into Gauteng province from another province or country?";  
41 (ii) When (year) did you move into Gauteng province?; (iii) Did you move to Gauteng province  
42 from a province in South Africa or from another country?; (iv) From which province did you  
43 move from into Gauteng province?; and (v) Which country did you move into Gauteng province  
44 from?. Migration status then was divided into three groups: non-migrant, internal migrant, and  
45 external migrant. The explanatory variables included sex, age, race, education, employment  
46 status, dwelling, total household income, grow own vegetables, medical aid, physical activity,  
47 household size, household food security and socioeconomic status quintile. Information  
48 collected included demographic and socio-economic variables: sex (female, male); age (18  
49 years and above); race (African, Coloured, Indian/Asian, White and Other); Education was  
50 categorized into 'No formal education', grades R-7 'Primary only', grades 8-11 'Secondary  
51 incomplete', 'Matric' grade 12 'More' Tertiary and above and 'Unspecified' for those who didn't  
52 specify; employment status ('employed', 'unemployed and other').  
53  
54

55 Dwelling (formal, informal and other); Total household income was categorized into 'Lower  
56 class income' (< 6400 Rand [ZAR] per month), 'Middle class income' (R6400 - R51, 200 per  
57 month) and 'Upper class income' (> R51, 200 per month); grow own vegetables (do not grow  
58 own vegetables and grow their own vegetables); Medical insurance was categorized into  
59 'medically insured' for respondents with either medical aid or a hospital plan and 'medically  
60 not insured' for respondents without any of these; physical activity (never, hardly ever, few

times a month, few times a week and everyday); household size (1-3, 4-6 and 7+); household food security (never, seldom, sometimes, often and always) and socioeconomic status quintile (richest, 2<sup>nd</sup>, 3<sup>rd</sup>, 4<sup>th</sup> and poorest). The ward level variables included migrant African population, African population, migrant SADC population, employed population, no income population, sampi and household of less than three.

### Analysis

Descriptive analysis was performed to describe the migration status of the community by socio demographic characteristics of study respondents using proportions. The prevalence of morbidities in Gauteng province, South Africa was estimated using proportions and presented as percentages with 95% confidence intervals. Prevalence of morbidities was stratified by age, sex and migration status.

In the present analysis the data used was in multilevel structure as the respondents were within administrative wards [14]. We applied a recently developed original, stepwise-multilevel logistic regression of discriminatory accuracy to investigate the effect of migration status. We fitted separate models for effect of migration status on diabetes and hypertension, respectively. Four progressively adjusted multilevel models were carried out: model 0 with no covariates; model 1 including only sociodemographic characteristics at the individual level; model 2 additionally analysing municipal deprivation as contextual variable and model 3 is the full adjusted model. The models were adjusted for years in GP, age, sex, race, dwelling, education level, household size, household head, physical activity, medical aid, grow own vegetables, household food security, sampi, year moved to GP and socioeconomic status quintile. Potential effect modification by age, sex, race, SES and sampi was tested.

These variables were selected because they are strongly linked to migration status. There is evidence that migration is associated with age [12]. The hypothesis is that effect of migration will be modified age where young age will have protective effect hypertension and diabetes. There is also differential migration patterns by race and SES. In South Africa, race and SES are also strongly correlated [3,4,12]. The other variables were treated as potential confounders.

To take account of the hierarchical data structure (level 1: individuals; level 2: administrative wards), an Intraclass Correlation Coefficient (ICC) and ward-level variances were reported for every model and for reasons of better interpretability, ward-level variances were converted into median ORs (MORs) by applying the formula of Merlo *et al*, [14, 15]. Multilevel logistic regression analyses with administrative wards as random intercepts were performed calculating ORs with their 95% CIs. ORs were plotted using the user-written *coefplot* Stata command [16]. All analysis was performed using Stata version 13 (Stata Corporation, College Station, Texas, USA).

### Results

Most respondents were non-migrants 18,027 (64%) and the external migrants constituted only 8% of the total respondents. Of the total study population of 28,007 respondents 14,966 (53%) were female (**Table 1**). The majority of the respondents were aged between 18 to 27 years and were African 22,560 (79%). Most respondents 9,152 (33%) had matric level of education and only 443 (1.6%) had no formal education. Close to half of the respondents were employed 13,582 (49%). The majority of the respondents stayed in formal dwellings 24,043 (86%). A large proportion of the respondents fall under the lower income bracket based on their total household income 13,015 (71%) lower class was defined in this study as families with a total household income of less than R6,400 per month while 2.3% fall under the upper class (Upper class is a family with an income more than R51,200). Few respondents reported growing their own vegetables 3,480 (12%).

Table 1: Demographic characteristics across migration status

| Variable            | Level                  | Non- migrants  | Internal migrants | External migrants | Total          |
|---------------------|------------------------|----------------|-------------------|-------------------|----------------|
| Sex                 | Female                 | 9,746 (54.06)  | 4,226 (54.05)     | 994 (46.00)       | 14,966 (53.44) |
|                     | Male                   | 8,281 (45.94)  | 3,593 (45.95)     | 1,167 (54.00)     | 13,041 (46.56) |
| Age group           | 18-27                  | 5,288 (29.33)  | 2,205 (28.20)     | 701 (32.44)       | 8,194 (29.26)  |
|                     | 28-37                  | 4,400 (24.41)  | 2,197 (28.10)     | 781 (36.14)       | 7,378 (26.34)  |
|                     | 38-47                  | 3,362 (18.65)  | 1,507 (19.27)     | 347 (16.06)       | 5,216 (18.62)  |
|                     | 48-57                  | 2,456 (13.62)  | 938 (12.00)       | 159 (7.36)        | 3,553 (12.69)  |
|                     | 58-67                  | 1,493 (8.28)   | 503 (6.43)        | 84 (3.89)         | 2,080 (7.43)   |
|                     | 68+                    | 1,028 (5.70)   | 469 (6.00)        | 89 (4.12)         | 1,586 (5.66)   |
| Race                | African                | 13,819 (76.66) | 6,901 (88.26)     | 1 840 (85.15)     | 22,560 (80.55) |
|                     | Coloured               | 940 (5.21)     | 180 (2.30)        | 9 (0.42)          | 1,129 (4.03)   |
|                     | Indian/Asian           | 389 (2.16)     | 154 (1.97)        | 75 (3.47)         | 618 (2.21)     |
|                     | White                  | 2,848 (15.80)  | 575 (7.35)        | 157 (7.27)        | 3,580 (12.78)  |
|                     | Other                  | 31 (0.17)      | 9 (0.12)          | 80 (3.70)         | 120 (0.43)     |
| Education           | No education           | 223 (1.25)     | 162 (2.10)        | 58 (2.72)         | 443 (1.60)     |
|                     | Primary only           | 1,621 (9.09)   | 1,029 (13.32)     | 368 (17.23)       | 3,018 (10.90)  |
|                     | Secondary incomplete   | 5,007 (28.08)  | 2,451 (31.73)     | 712 (33.33)       | 8,170 (29.50)  |
|                     | Matric                 | 6,210 (34.83)  | 2,468 (31.95)     | 474 (22.19)       | 9,152 (33.05)  |
|                     | More                   | 4,399 (24.67)  | 1,526 (19.76)     | 419 (19.62)       | 6,344 (22.91)  |
|                     | Unspecified            | 371 (2.08)     | 88 (1.14)         | 105 (4.92)        | 564 (2.04)     |
| Employment status   | Employed               | 8,426 (47.08)  | 3,838 (49.48)     | 1,318 (61.47)     | 13,582 (48.86) |
|                     | Unemployed             | 4,808 (26.86)  | 2,282 (29.42)     | 444 (20.71)       | 7,534 (27.10)  |
|                     | Other                  | 4,664 (26.06)  | 1,636 (21.09)     | 382 (17.82)       | 6,682 (24.04)  |
| Dwelling            | Formal                 | 16,478 (91.41) | 5,954 (76.15)     | 1,611 (74.55)     | 24,043 (85.85) |
|                     | Informal               | 1,442 (8.00)   | 1,659 (21.22)     | 482 (22.30)       | 3,583 (12.79)  |
|                     | Other                  | 107 (0.59)     | 206 (2.63)        | 68 (3.15)         | 381 (1.36)     |
| Total HH Income     | Lower Class            | 7,991 (68.85)  | 4,000 (75.03)     | 1,024 (72.21)     | 13,015 (70.90) |
|                     | Middle Class           | 3,325 (28.65)  | 1,246 (23.37)     | 356 (25.11)       | 4,927 (26.84)  |
|                     | Upper class            | 291 (2.51)     | 85 (1.59)         | 38 (2.68)         | 414 (2.26)     |
| Grow own vegetables | Do not grow vegetables | 15,850 (87.92) | 6,772 (86.61)     | 1,905 (88.15)     | 24,527 (87.57) |
|                     | Grow vegetables        | 2,177 (12.08)  | 1,047 (13.39)     | 256 (11.85)       | 3,480 (12.43)  |
| Medical Aid         | No medical insurance   | 12,219 (71.26) | 5,883 (78.44)     | 1,707 (82.66)     | 19,809 (74.16) |
|                     | Medical insurance      | 4,927 (28.74)  | 1,617 (21.56)     | 358 (17.34)       | 6,902 (25.84)  |
| Physical activity   | Never                  | 4,478 (25.11)  | 2,481 (32.12)     | 684 (32.02)       | 7,643 (27.60)  |
|                     | Hardly ever            | 2,357 (13.22)  | 934 (12.09)       | 271 (12.69)       | 3,562 (12.86)  |
|                     | Few times a month      | 2,447 (13.72)  | 851 (11.02)       | 202 (9.46)        | 3,500 (12.64)  |
|                     | Few times a week       | 4,356 (24.43)  | 1,687 (21.84)     | 445 (20.83)       | 6,488 (23.43)  |
|                     | Everyday               | 4,193 (23.52)  | 1,771 (22.93)     | 534 (25.00)       | 6,498 (23.47)  |
| HH size             | 1-3                    | 9,167 (51.41)  | 4,451 (57.63)     | 1,491 (69.80)     | 15,109 (54.56) |
|                     | 4-6                    | 6,736 (37.78)  | 2,631 (34.06)     | 562 (26.31)       | 9,929 (35.86)  |
|                     | 7+                     | 1,928 (10.81)  | 642 (8.31)        | 83 (3.89)         | 2,653 (9.58)   |
| HH Food security    | Never                  | 14,372 (79.72) | 6,095 (77.95)     | 1,813 (83.90)     | 22,280 (79.55) |



| Variable              | Level                    | Non- migrants | Internal migrants | External migrants | Total         |
|-----------------------|--------------------------|---------------|-------------------|-------------------|---------------|
|                       | Seldom                   | 1,138 (6.31)  | 496 (6.34)        | 110 (5.09)        | 1,744 (6.23)  |
|                       | Sometimes                | 2,008 (11.14) | 993 (12.70)       | 199 (9.21)        | 3,200 (11.43) |
|                       | Often                    | 345 (1.91)    | 147 (1.88)        | 23 (1.06)         | 515 (1.84)    |
|                       | Always                   | 164 (0.91)    | 88 (1.13)         | 16 (0.74)         | 268 (0.96)    |
| SES quintiles         | Richest                  | 2,716 (15.15) | 2,136 (27.81)     | 661 (31.12)       | 5,513 (19.88) |
|                       | 2 <sup>nd</sup> quintile | 3,549 (19.79) | 1,608 (20.93)     | 398 (18.74)       | 5,555 (20.03) |
|                       | 3 <sup>rd</sup> quintile | 3,627 (20.23) | 1,498 (19.50)     | 368 (17.33)       | 5,493 (19.81) |
|                       | 4 <sup>th</sup> quintile | 3,972 (22.15) | 1,293 (16.83)     | 346 (16.29)       | 5,611 (20.23) |
|                       | Poorest                  | 4,066 (22.68) | 1,146 (14.92)     | 351 (16.53)       | 5,563 (20.06) |
| Year moved to Gauteng | After 2009               |               | 1,543 (19.74)     | 673 (31.14)       | 2,216 (22.21) |
|                       | 2005-2009                |               | 1,242 (15.89)     | 589 (27.26)       | 1,831 (18.35) |
|                       | 1995-2004                |               | 2,524 (32.28)     | 519 (24.02)       | 3,043 (30.49) |
|                       | 1985-1994                |               | 1,290 (16.50)     | 217 (10.04)       | 1,507 (15.10) |
|                       | Before 1985              |               | 1,219 (15.59)     | 163 (7.54)        | 1,382 (13.85) |

### The prevalent morbidities in Gauteng province

The overall prevalence of hypertension and diabetes was 15.5% (95% CI: 15.1-15.9), 11.2% (95% CI: 10.8-11.6), respectively (**Table 2**). The prevalence of hypertension and diabetes was higher among non-migrants.

Table 2: Prevalence of hypertension and diabetes

| Characteristics         | Hypertension % (95% CI) | Diabetes % (95% CI) |
|-------------------------|-------------------------|---------------------|
| <b>Overall</b>          | 15.5 (15.1 - 15.9)      | 11.2 (10.8 - 11.6)  |
| <b>Age group years</b>  |                         |                     |
| 18-27                   | 11.3 (10.5 - 12.1)      | 8.4 (7.7 - 9.1)     |
| 28-37                   | 8.7 (8.1 - 9.4)         | 6.3 (5.7 - 6.8)     |
| 38-47                   | 11.8 (11.0 - 12.6)      | 9.0 (8.3 - 9.7)     |
| 48-57                   | 21.1 (19.9 - 22.5)      | 14.6 (13.5 - 15.8)  |
| 58-67                   | 32.2 (30.3 - 34.1)      | 21.4 (19.7 - 23.1)  |
| 68+                     | 39.8 (37.5 - 42.2)      | 30.5 (28.3 - 32.7)  |
| <b>Sex</b>              |                         |                     |
| Male                    | 12.1 (11.5 - 12.7)      | 10.1 (9.6 - 10.6)   |
| Female                  | 18.5 (17.9 - 19.1)      | 12.1 (11.7 - 12.7)  |
| <b>Migration status</b> |                         |                     |
| Non-migrant             | 16.8 (16.3 - 17.4)      | 12.6 (12.1 - 13.1)  |
| Internal migrant        | 14.4 (13.7 - 15.2)      | 9.7 (9.1 - 10.4)    |
| External migrant        | 8.1 (7.1 - 9.4)         | 5.1 (4.3 - 6.2)     |

Note: % = percentage, 95%CI = 95% Confidence Interval

### The effect of migration status on hypertension and diabetes

The effect of migration status on hypertension and diabetes based on analysis of multilevel logistic regression models is presented on **Table 3**. Three models were fitted, the first model only included the individual or household factors, the second model included ward factors and the final model included all factors. Compared to non-migrants, internal migrants and external migrants in the final model had reduced odds of self-reporting hypertension with the OR of 0.86 (95% CI: 0.78-0.95) and 0.60 (95% CI: 0.49-0.75) respectively. Being a migrant was also associated with lower risk of diabetes with OR of 0.84 (95% CI: 0.75-0.94) and 0.53 (95% CI: 0.41-0.68). While there was a reduction in the variance between the null and full models and ICC vary for both outcomes. There was substantial residual between-ward variance in

hypertension and diabetes with median odds ratio of 1.31 and 1.14 respectively as presented in the final model.

Table 3: The effect of migration status on the most prevalent morbidities

| Characteristics            | Null Model       | Model 1 <sup>a</sup> | Model 2 <sup>b</sup> | Model 3 <sup>c</sup> |
|----------------------------|------------------|----------------------|----------------------|----------------------|
|                            |                  | OR (95% CI)          | OR (95% CI)          | OR (95% CI)          |
| <b>Hypertension</b>        |                  |                      |                      |                      |
| <b>Migration status</b>    |                  |                      |                      |                      |
| Non-migrant                |                  | 1.00                 | 1.00                 | 1.00                 |
| Internal migrant           |                  | 0.85 (0.77-0.95)     | 0.90 (0.83-0.97)     | 0.86 (0.78-0.95)     |
| External migrant           |                  | 0.59 (0.48-0.74)     | 0.52 (0.44-0.61)     | 0.60 (0.49-0.75)     |
| <b>Random Effects</b>      |                  |                      |                      |                      |
| Between-ward variance (SE) | 0.25 (0.050)     | 0.15 (0.035)         | 0.10 (0.023)         | 0.08 (0.021)         |
| ICC                        | 0.07             | 0.04                 | 0.03                 | 0.02                 |
| MOR                        | 1.61 (1.46-1.76) | 1.45 (1.33-1.57)     | 1.35(1.26-1.44)      | 1.31 (1.22-1.40)     |
| <b>Diabetes</b>            |                  |                      |                      |                      |
| <b>Migration status</b>    |                  |                      |                      |                      |
| Non-migrant                |                  | 1.00                 | 1.00                 | 1.00                 |
| Internal migrant           |                  | 0.84 (0.75-0.94)     | 0.77 (0.70-0.84)     | 0.84 (0.75-0.94)     |
| External migrant           |                  | 0.51 (0.40-0.66)     | 0.41 (0.37-0.50)     | 0.53 (0.41-0.68)     |
| <b>Random Effects</b>      |                  |                      |                      |                      |
| Between-ward variance (SE) | 0.05 (0.014)     | 0.04 (0.015)         | 0.02 (0.007)         | 0.02 (0.011)         |
| ICC                        | 0.02             | 0.01                 | 0.01                 | 0.00                 |
| MOR                        | 1.24 (1.17-1.31) | 1.22 (1.13-1.30)     | 1.13 (1.07-1.19)     | 1.14 (1.06-1.22)     |

Note: OR = Odds ratio, 95%CI = 95% Confidence Interval, ICC = intraclass correlation coefficient, MOR = median odds ratio, Model 1<sup>a</sup> = the individual/HH level factors, Model 2<sup>b</sup> = the Ward level factors and Model 3<sup>c</sup> = all factors.

To further assess effect modification of age, race and SES, we ran grade-stratified analysis. The association between migration status and hypertension is significantly modified by race. For Africans, migration status (both internal and external) was associated with lower odds of hypertension, while internal and external Asian migrants have higher odds of hypertension. From the interaction assessment between migration status and race, age group and socioeconomic status, respectively were found to be effect modifiers for hypertension (Figure 1) and diabetes (Figure 2).

Figure 1: Association between migration status and hypertension, by SES, race and age group

Figure shows SES-, race-, and age group-stratified, fully adjusted ORs in hypertension and associated 95% CIs.

Figure 2: Association between migration status and diabetes, by SES, race, and age group

Figure shows SES-, race-, and age group-stratified, fully adjusted ORs in diabetes and associated 95% CIs.

## Discussion

The findings from this study provide important information on migration status and the prevalence of morbidities among residents of 508 administrative wards in Gauteng province from a population-based survey. The study indicates that migration status is associated with prevalence of hypertension and diabetes conditions. Internal and external migrants had lower odds of both hypertension and diabetes than people born in Gauteng province. Age, race and SES of the respondents were significant effect modifiers of the association between migration status and morbidities. The major strength of this study is that it assesses prevalence of morbidities and predictors of the most prevalent morbidities from a large population-based survey. The potential of the study was maximized and included the vulnerable population like migrants. The migrants made up 36% of the total respondents.



1  
2  
3  
4 The most prevalent morbidities in Gauteng province were hypertension and diabetes at 15,5%  
5 and 11.2% respectively. The prevalence of diabetes in South Africa is increasing rapidly [17].  
6 In 2009 it was approximately 9% among those aged 30 years and older [18]. Based on the  
7 population census the prevalence of diabetes was around 9% according to the International  
8 Diabetes Federation (IDF) [19, 20]. Hypertension was found to be around 14.0% for those  
9 aged 25 and older [21]. SANHANES reported slightly higher prevalence of diabetes (19.4%)  
10 and hypertension (25.7%) [10]. Hypertension and diabetes were higher among non-migrants.  
11 The migrant population is believed to keep increasing in different countries; their heterogeneity  
12 becomes apparent with respect to the differences in the prevalence of diseases [7].  
13 Prevalence is likely to increase therefore, these findings can be used to inform future policy,  
14 planning and funding allocation to assist in controlling as well as managing different conditions  
15 [22].  
16

17  
18 Migration status was associated with prevalence of hypertension and diabetes in Gauteng  
19 province. Non-communicable diseases are the most common health problem and are the  
20 primary cause of death in many countries [23]. Research revealed that compared to native-  
21 born respondents, migrants reported better health [24]. This could be attributed to healthy  
22 migration effect, healthier individuals are more likely to migrate. This is consistent with our  
23 findings, migrants reported lower prevalence of diabetes and hypertension. Reasons for  
24 migration were not included in the questionnaire administered in the primary study; these  
25 might have a bearing on the prevalence of hypertension and diabetes among migrants in  
26 Gauteng province. Effect of migration status on health differed by age group, race and socio-  
27 economic status. Migrants might find themselves in a worse socioeconomic status, with less  
28 access to health care services, and experiencing greater linguistic and cultural barriers related  
29 to accessing health information, despite the conditions they tend to have better health profiles  
30 compared to the natives [25]. A number of studies have shown that this health advantage  
31 deteriorates over time and with successive generations [24, 26, 27]. There is a lack of studies  
32 on morbidity among migrants compared to natives [7]. This study clearly demonstrates a need  
33 for more research on migration and different morbidities.  
34

### 35 **Strengths and limitations**

36 This study contributes to the knowledge on migration status and morbidities in Gauteng  
37 province, South Africa. Assessment of predicts for the most prevalent morbidities was done  
38 from a very large population based representative sample survey. Therefore, the power of the  
39 study to detect significant associations was maximized. The respondents were selected by  
40 random sampling thus both internal and external validity of the study were improved. The  
41 study included the migrant population and little research has been done on the morbidities  
42 affecting this sub-population. A wide variety of socio-demographic factors were employed to  
43 assess their association with the two most prevalent morbidities.  
44  
45

46 The morbidities were self-reported thus prevalence might be underestimated. Self-reported  
47 data can be biased by differential access to healthcare services between groups of different  
48 socioeconomic status [28]. When self-reported information was compared with medical  
49 records or clinical measurements from health examination surveys in Colorado, Netherlands  
50 and 12 countries in Europe, self-reported information underestimated the prevalence of  
51 hypertension [29, 30]. It is worth noting that the results from these studies may not be valid for  
52 the South African context. This calls for more research on migration status and morbidities, as  
53 well as validity studies of self-reported morbidities in the South African setting.  
54

55  
56 Missing data of some important health-related information, might have resulted in residual  
57 confounding because of unmeasured potential confounders.  
58

### 59 **Conclusion**

1  
2  
3 Migration status is associated with the prevalence of hypertension and diabetes in Gauteng  
4 province. From the public health perspective, it is important to evaluate the prevalence of  
5 morbidities because the information can inform the development of prevention programme on  
6 a community level.  
7

### 8 **Acknowledgements**

9 The authors would like to thank Gauteng City-Region Observatory (GCRO) for providing us with the  
10 data to conduct the research.  
11

### 12 **Author contributions**

13 Concept and design of the study: JN, Acquisition of data: JN, Analysis and interpretation of data: JN,  
14 MM, Drafting the manuscript: JN, MM, Revising the manuscript critically for important intellectual  
15 content: JN, MM and approval of the manuscript to be published: JN and MM  
16

### 17 **Disclosure statement**

18 No potential conflict of interest was reported by the authors.  
19  
20

### 21 **Ethics and Consent**

22 For the primary study ethics approval was obtained from the local ethics committee and the Human  
23 Research Ethics Committee of University of the Witwatersrand. All respondents provided informed  
24 consent before data collection. The study was granted ethics clearance by the Human Research Ethics  
25 Committee of University of the Witwatersrand.  
26

### 27 **Funding Information**

28 None.  
29  
30

### 31 **Data sharing**

32 No additional data available.  
33  
34  
35  
36

37 **Word count:** 2729 (excluding title, abstract, reference, figures and tables,  
38 acknowledgements, author contribution, disclosure statement, ethics and consent and funding  
39 information).  
40  
41  
42  
43  
44  
45  
46  
47  
48  
49  
50  
51  
52  
53  
54  
55  
56  
57  
58  
59  
60

## References

1. Patra S, Bhise MD. Gender differentials in prevalence of self-reported non-communicable diseases (NCDs) in India: evidence from recent NSSO survey. *Journal of Public Health*. 2016;24(5):375-385.
2. Westman J, Martelin T, Härkänen T, Koskinen S, Sundquist K. Migration and self-rated health: a comparison between Finns living in Sweden and Finns living in Finland. *Scandinavian Journal of Public Health*. 2008;36(7):698-705.
3. Kok P, Collinson M. Migration and urbanization in South Africa. Pretoria, South Africa: Statistics South Africa, 2006.
4. Turok I. Urbanisation and development in South Africa: economic imperatives, spatial distortions and strategic responses. Pretoria, South Africa Environment Development United Nations Population Fund, 2012.
5. Grief MJ, Dodoo FN, Jayaraman A. Urbanisation, Poverty and Sexual behaviour: The tale of Five African cities. *Urban Studies*. 2011;48(5):947-957.
6. Thomas F, Haour-Knipe M, Aggleton P. Mobility, Sexuality and AIDS. New York, USA: Routledge; 2010.
7. Diaz E, Poblador-Pou B, Gimeno-Feliu L, Calderón-Larrañaga A, Kumar BN, Prados-Torres A. Multimorbidity and Its Patterns according to Immigrant Origin. A Nationwide Register-Based Study in Norway. *PLoS ONE* 2015;10(12):e0145233.
8. World Health Organization. Global status report on non-communicable diseases 2014. Geneva, World Health Organization, 2012.
9. Mills KT, Bundy JD, Kelly TN, Reed JE, Kearney PM, Reynolds K, et al. Global Disparities of Hypertension Prevalence and Control A Systematic Analysis of Population-Based Studies from 90 Countries. *Circulation*. 2016;134:441-450.
10. Shisana O, Labadarios D, Rehle T, Simbayi L, Zuma K, Dhansay A, et al. (2013) South African National Health and Nutrition Examination Survey (SANHANES-1). Cape Town: HSRC Press.
11. Gauteng City Region Observatory. GCRO Data Brief Key: Findings from Statistics South Africa's 2011 National Census for Gauteng. South Africa. Gauteng City Region Observatory, 2012.
12. Statistics South Africa. Statistical Release: Census 2011 South Africa. Pretoria, South Africa: Statistics South Africa 2012.
13. Gauteng City Region Observatory. Quality of life Survey Technical Report. Johannesburg, South Africa: Gauteng City Regional Observatory 2015.
14. Merlo J, Wagner P, Ghith N, Leckie G. An Original Stepwise Multilevel Logistic Regression Analysis of Discriminatory Accuracy: The Case of Neighbourhoods and Health. *PLoS ONE*. 2016;11(4):e0153778.
15. Adjaye-Gbewonyo K, Kawachi I, Subramanian SV, Avendano M. Income inequality and cardiovascular disease risk factors in a highly unequal country: a fixed-effects analysis from South Africa. *International Journal for Equity in Health*. 2018;17 (31):1-13.
16. Jann B. Plotting regression coefficients and other estimates. *The Stata Journal*. 2014; 14(4):708-737.
17. Pheiffer C, Pillay-van Wyk V, Joubert JD, Levitt N, Nglazi MD, Bradshaw D. The prevalence of type 2 diabetes in South Africa: a systematic review protocol. *BMJ Open* 2018;8:e021029.
18. Bertram MY, Jaswal AVS, Van Wyk VP, Levitt NS, Hofman KJ. The non-fatal disease burden caused by type 2 diabetes in South Africa, 2009. *Global Health Action*. 2013;6(1):19244.

19. International Diabetes Federation (IDF), Diabetes Atlas. Seventh Edition. Brussels, IDF. 2015.
20. Statistics South Africa (StatsSA). Mid-year population estimates 2015. 2015.
21. Statistics South Africa. Use of health facilities and levels of selected health conditions in South Africa: Findings from the General Household Survey, Pretoria, South Africa: Statistics South Africa 2013.
22. Keel S, Foreman J, Xie J, van Wijngaarden P, Taylor HR, Dirani M. The Prevalence of Self-Reported Diabetes in the Australian National Eye Health Survey. PLoS ONE. 2017;12(1):e0169211.
23. Teh JKL, Tey NP, Ng ST. Ethnic and Gender Differentials in Non-Communicable Diseases and Self-Rated Health in Malaysia. PLoS ONE. 2014;9:e91328.
24. Lee S, O'Neill AH, Ihara ES, Chae DH. Change in Self-Reported Health Status among Immigrants in the United States: Associations with Measures of Acculturation. PLoS ONE. 2013;8(10):e76494.
25. Frisbie WP, Cho Y, Hummer RA. Immigration and the health of Asian and Pacific Islander adults in the United States. American Journal of Epidemiology. 2001;153(4):372-380.
26. Antecol H, Bedard K. Unhealthy assimilation: Why do immigrants converge to American health status levels? Demography. 2006;43(2): 337-360. doi:10.1353/dem.2006.0011. PubMed: 16889132.
27. Singh GK, Miller BA. Health, Life Expectancy, and Mortality Patterns Among Immigrant Populations in the United States. Canadian Journal of Public Health. 2004; 95(3): 114-121. PubMed: 15191127.
28. Vellakkal S, Subramanian SV, Millett C, Basu S, Stuckler D, Ebrahim S. Socioeconomic Inequalities in Non-Communicable Diseases Prevalence in India: Disparities between Self-Reported Diagnoses and Standardized Measures. PLoS ONE 2013;8(7):e68219.
29. Tolonen H, Koponen P, Mindell JS, Männistö S, Giampaoli S, Dias CM, et al. Underestimation of obesity, hypertension and high cholesterol by self-reported data: comparison of self-reported information and objective measures from health examination surveys. European Journal of Public Health. 2014;24(6):941-8.
30. Molenaar EA, Van Ameijden EJ, Grobbee DE, Numans ME. Comparison of routine care self-reported and biometrical data on hypertension and diabetes: results of the Utrecht Health Project. European Journal of Public Health. 2007;17(2):199-205.

1  
2  
3  
4  
5  
6  
7  
8  
9  
10  
11  
12  
13  
14  
15  
16  
17  
18  
19  
20  
21  
22  
23  
24  
25  
26  
27  
28  
29  
30  
31  
32  
33  
34  
35  
36  
37  
38  
39  
40  
41  
42  
43  
44  
45  
46  
47  
48  
49  
50  
51  
52  
53  
54  
55  
56  
57  
58  
59  
60

For peer review only

1  
2  
3  
4  
5  
6  
7  
8  
9  
10  
11  
12  
13  
14  
15  
16  
17  
18  
19  
20  
21  
22  
23  
24  
25  
26  
27  
28  
29  
30  
31  
32  
33  
34  
35  
36  
37  
38  
39  
40  
41  
42  
43  
44  
45  
46  
47  
48  
49  
50  
51  
52  
53  
54  
55  
56  
57  
58  
59  
60



Association between migration status and hypertension, by SES, race and age group

90x90mm (300 x 300 DPI)

1  
2  
3  
4  
5  
6  
7  
8  
9  
10  
11  
12  
13  
14  
15  
16  
17  
18  
19  
20  
21  
22  
23  
24  
25  
26  
27  
28  
29  
30  
31  
32  
33  
34  
35  
36  
37  
38  
39  
40  
41  
42  
43  
44  
45  
46  
47  
48  
49  
50  
51  
52  
53  
54  
55  
56  
57  
58  
59  
60

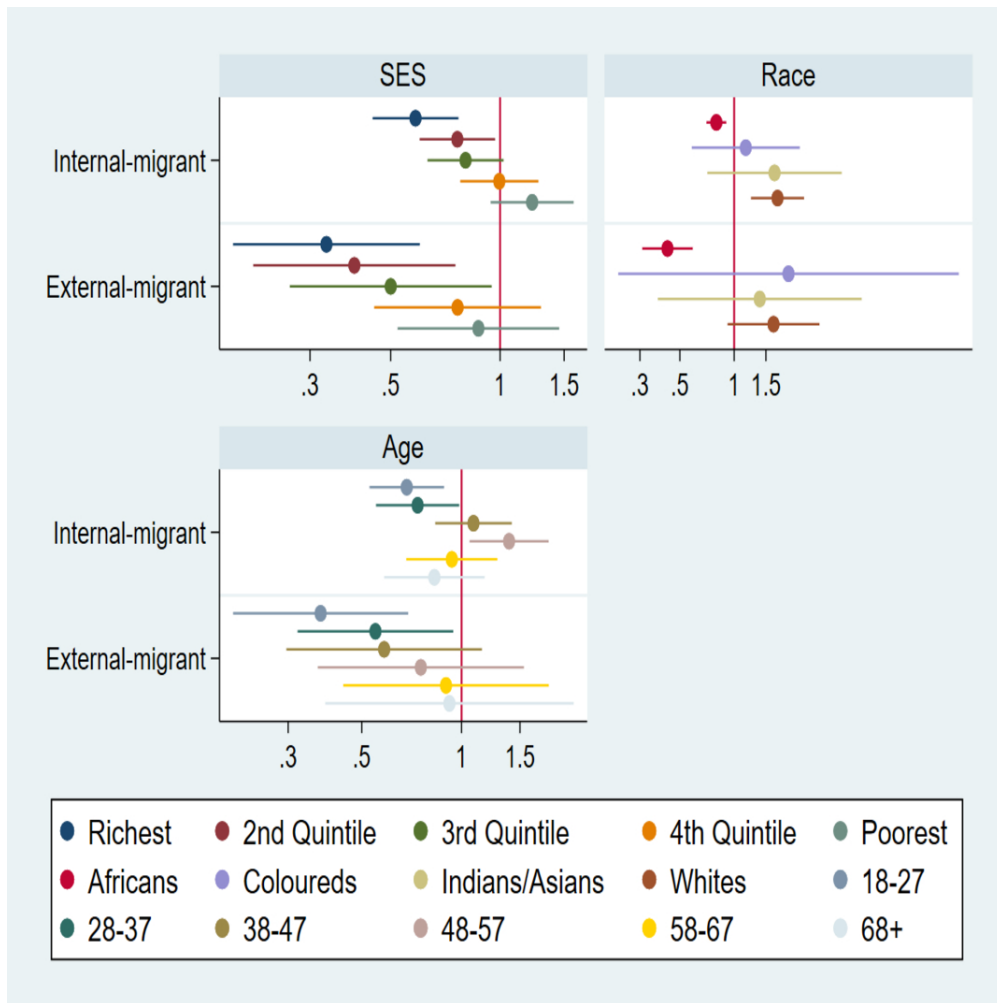

Association between migration status and diabetes, by SES, race, and age group

90x90mm (300 x 300 DPI)



**STROBE 2007 (v4) checklist of items to be included in reports of observational studies in epidemiology\***  
**Checklist for cohort, case-control, and cross-sectional studies (combined)**

| Section/Topic             | Item # | Recommendation                                                                                                                                                                                                                                                                                                                                                                                                                                                         | Reported on page # |
|---------------------------|--------|------------------------------------------------------------------------------------------------------------------------------------------------------------------------------------------------------------------------------------------------------------------------------------------------------------------------------------------------------------------------------------------------------------------------------------------------------------------------|--------------------|
| Title and abstract        | 1      | (a) Indicate the study's design with a commonly used term in the title or the abstract                                                                                                                                                                                                                                                                                                                                                                                 | 1                  |
|                           |        | (b) Provide in the abstract an informative and balanced summary of what was done and what was found                                                                                                                                                                                                                                                                                                                                                                    | 1                  |
| <b>Introduction</b>       |        |                                                                                                                                                                                                                                                                                                                                                                                                                                                                        |                    |
| Background/rationale      | 2      | Explain the scientific background and rationale for the investigation being reported                                                                                                                                                                                                                                                                                                                                                                                   | 2                  |
| Objectives                | 3      | State specific objectives, including any pre-specified hypotheses                                                                                                                                                                                                                                                                                                                                                                                                      | 2                  |
| <b>Methods</b>            |        |                                                                                                                                                                                                                                                                                                                                                                                                                                                                        |                    |
| Study design              | 4      | Present key elements of study design early in the paper                                                                                                                                                                                                                                                                                                                                                                                                                | 2                  |
| Setting                   | 5      | Describe the setting, locations, and relevant dates, including periods of recruitment, exposure, follow-up, and data collection                                                                                                                                                                                                                                                                                                                                        | 2                  |
| Participants              | 6      | (a) <i>Cohort study</i> —Give the eligibility criteria, and the sources and methods of selection of participants. Describe methods of follow-up<br><i>Case-control study</i> —Give the eligibility criteria, and the sources and methods of case ascertainment and control selection. Give the rationale for the choice of cases and controls<br><i>Cross-sectional study</i> —Give the eligibility criteria, and the sources and methods of selection of participants | 3                  |
|                           |        | (b) <i>Cohort study</i> —For matched studies, give matching criteria and number of exposed and unexposed<br><i>Case-control study</i> —For matched studies, give matching criteria and the number of controls per case                                                                                                                                                                                                                                                 |                    |
| Variables                 | 7      | Clearly define all outcomes, exposures, predictors, potential confounders, and effect modifiers. Give diagnostic criteria, if applicable                                                                                                                                                                                                                                                                                                                               | 3                  |
| Data sources/ measurement | 8*     | For each variable of interest, give sources of data and details of methods of assessment (measurement). Describe comparability of assessment methods if there is more than one group                                                                                                                                                                                                                                                                                   | 3                  |
| Bias                      | 9      | Describe any efforts to address potential sources of bias                                                                                                                                                                                                                                                                                                                                                                                                              |                    |
| Study size                | 10     | Explain how the study size was arrived at                                                                                                                                                                                                                                                                                                                                                                                                                              | 2                  |
| Quantitative variables    | 11     | Explain how quantitative variables were handled in the analyses. If applicable, describe which groupings were chosen and why                                                                                                                                                                                                                                                                                                                                           |                    |
| Statistical methods       | 12     | (a) Describe all statistical methods, including those used to control for confounding                                                                                                                                                                                                                                                                                                                                                                                  | 4                  |
|                           |        | (b) Describe any methods used to examine subgroups and interactions                                                                                                                                                                                                                                                                                                                                                                                                    | 4                  |
|                           |        | (c) Explain how missing data were addressed                                                                                                                                                                                                                                                                                                                                                                                                                            |                    |
|                           |        | (d) <i>Cohort study</i> —If applicable, explain how loss to follow-up was addressed<br><i>Case-control study</i> —If applicable, explain how matching of cases and controls was addressed                                                                                                                                                                                                                                                                              |                    |

|                          |     |                                                                                                                                                                                                                                                                                                                                                                                                               |   |
|--------------------------|-----|---------------------------------------------------------------------------------------------------------------------------------------------------------------------------------------------------------------------------------------------------------------------------------------------------------------------------------------------------------------------------------------------------------------|---|
|                          |     | <i>Cross-sectional study</i> —If applicable, describe analytical methods taking account of sampling strategy                                                                                                                                                                                                                                                                                                  |   |
|                          |     | (e) Describe any sensitivity analyses                                                                                                                                                                                                                                                                                                                                                                         |   |
| <b>Results</b>           |     |                                                                                                                                                                                                                                                                                                                                                                                                               |   |
| Participants             | 13* | (a) Report numbers of individuals at each stage of study—eg numbers potentially eligible, examined for eligibility, confirmed eligible, included in the study, completing follow-up, and analysed<br>(b) Give reasons for non-participation at each stage<br>(c) Consider use of a flow diagram                                                                                                               |   |
| Descriptive data         | 14* | (a) Give characteristics of study participants (eg demographic, clinical, social) and information on exposures and potential confounders<br>(b) Indicate number of participants with missing data for each variable of interest<br>(c) <i>Cohort study</i> —Summarise follow-up time (eg, average and total amount)                                                                                           | 3 |
| Outcome data             | 15* | <i>Cohort study</i> —Report numbers of outcome events or summary measures over time<br><i>Case-control study</i> —Report numbers in each exposure category, or summary measures of exposure<br><i>Cross-sectional study</i> —Report numbers of outcome events or summary measures                                                                                                                             | 3 |
| Main results             | 16  | (a) Give unadjusted estimates and, if applicable, confounder-adjusted estimates and their precision (eg, 95% confidence interval). Make clear which confounders were adjusted for and why they were included<br>(b) Report category boundaries when continuous variables were categorized<br>(c) If relevant, consider translating estimates of relative risk into absolute risk for a meaningful time period |   |
| Other analyses           | 17  | Report other analyses done—eg analyses of subgroups and interactions, and sensitivity analyses                                                                                                                                                                                                                                                                                                                | 4 |
| <b>Discussion</b>        |     |                                                                                                                                                                                                                                                                                                                                                                                                               |   |
| Key results              | 18  | Summarise key results with reference to study objectives                                                                                                                                                                                                                                                                                                                                                      | 8 |
| Limitations              | 19  | Discuss limitations of the study, taking into account sources of potential bias or imprecision. Discuss both direction and magnitude of any potential bias                                                                                                                                                                                                                                                    | 8 |
| Interpretation           | 20  | Give a cautious overall interpretation of results considering objectives, limitations, multiplicity of analyses, results from similar studies, and other relevant evidence                                                                                                                                                                                                                                    | 8 |
| Generalisability         | 21  | Discuss the generalisability (external validity) of the study results                                                                                                                                                                                                                                                                                                                                         | 8 |
| <b>Other information</b> |     |                                                                                                                                                                                                                                                                                                                                                                                                               |   |
| Funding                  | 22  | Give the source of funding and the role of the funders for the present study and, if applicable, for the original study on which the present article is based                                                                                                                                                                                                                                                 | 9 |

\*Give information separately for cases and controls in case-control studies and, if applicable, for exposed and unexposed groups in cohort and cross-sectional studies.

**Note:** An Explanation and Elaboration article discusses each checklist item and gives methodological background and published examples of transparent reporting. The STROBE checklist is best used in conjunction with this article (freely available on the Web sites of PLoS Medicine at <http://www.plosmedicine.org/>, Annals of Internal Medicine at <http://www.annals.org/>, and Epidemiology at <http://www.epidem.com/>). Information on the STROBE Initiative is available at [www.strobe-statement.org](http://www.strobe-statement.org).
